# Supplementary material for: Correcting the Bias Correction for the Bootstrap Confidence Interval in Mediation Analysis
Source: Frontiers journal article supplement (doi:10.3389/fpsyg.2022.810258), 2022-05-27
Supplement: Data_Sheet_1.pdf [file Data_Sheet_1.pdf]

# Correcting the Bias Correction for the Bootstrap Confidence Interval in Mediation Analysis

Supplementary Material

Tristan D. Tibbe, Amanda K. Montoya

# Type I Error Rate Graphs

Confidence Level = 90%

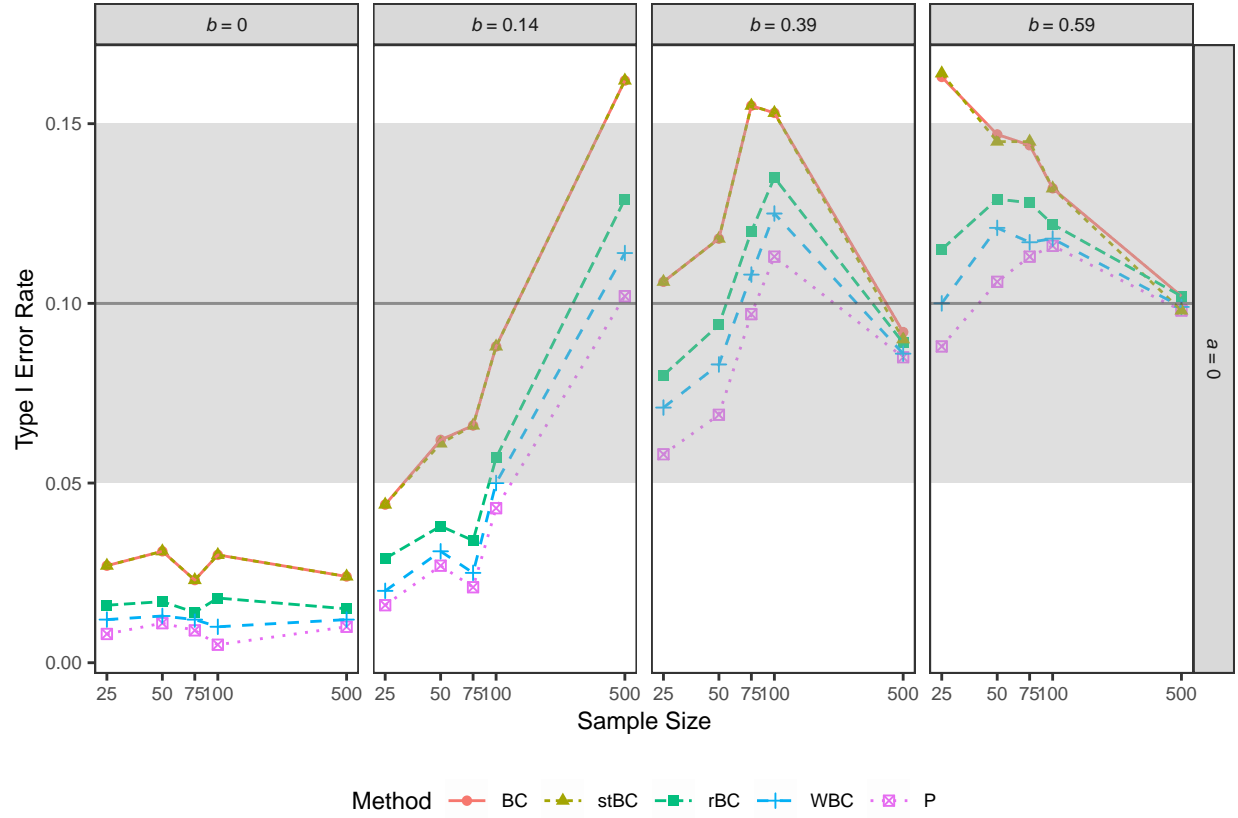

**SM Figure 1.** Type I error rate of all methods set at 90% confidence level when  $a$ -path is zero across the range of  $b$ -path sizes and sample sizes. *Note.* ‘BC’ = bias-corrected bootstrap confidence interval, ‘stBC’ = significance-tested bias-corrected bootstrap confidence interval, ‘rBC’ = reduced bias-corrected bootstrap confidence interval, ‘WBC’ = 30% Winsorized bias-corrected bootstrap confidence interval, ‘P’ = percentile bootstrap confidence interval. The black horizontal line at .10 on the graphs represents the target type I error rate determined by the  $\alpha$ -level of .10, and the grey shaded region indicates Bradley’s liberal robustness criterion (.05 to .15). The  $x$ -axis is on the natural log scale.

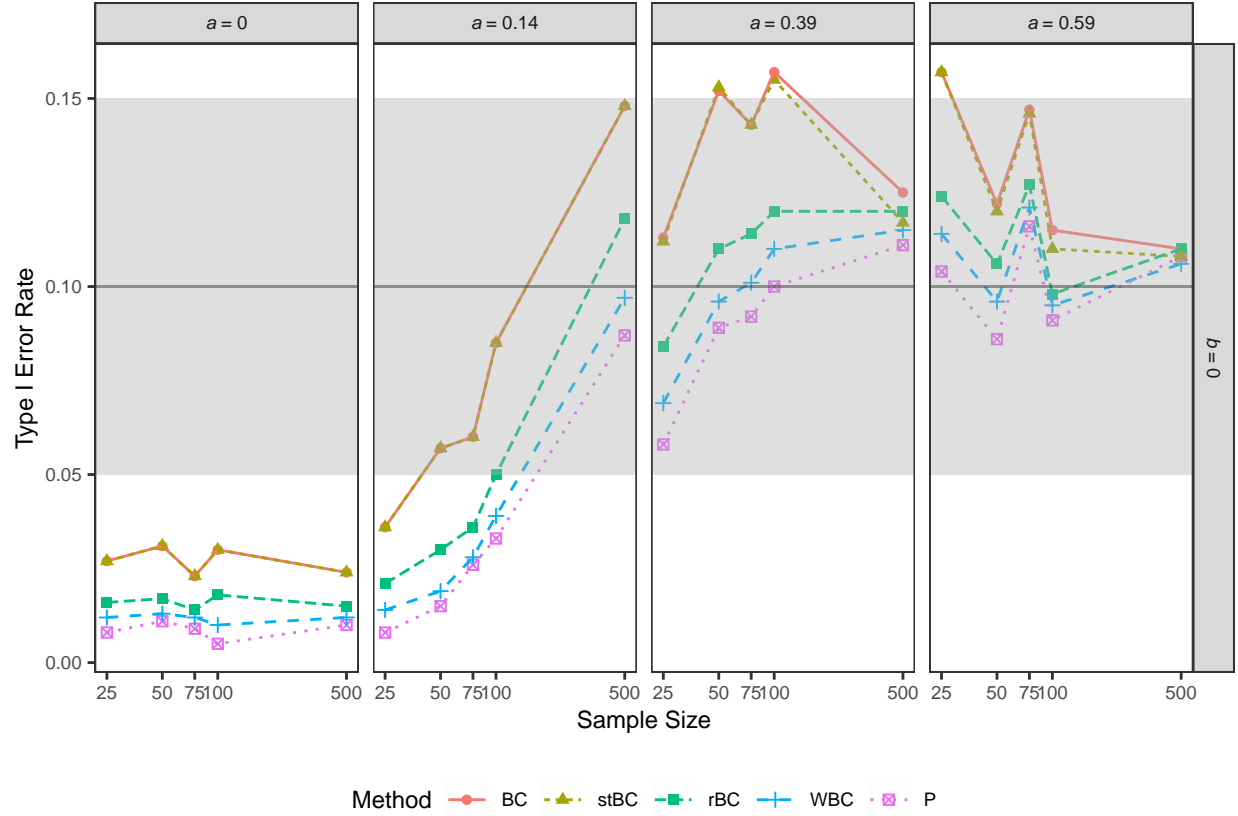

**SM Figure 2.** Type I error rate of all methods set at 90% confidence level when  $b$ -path is zero across the range of  $a$ -path sizes and sample sizes. *Note.* ‘BC’ = bias-corrected bootstrap confidence interval, ‘stBC’ = significance-tested bias-corrected bootstrap confidence interval, ‘rBC’ = reduced bias-corrected bootstrap confidence interval, ‘WBC’ = 30% Winsorized bias-corrected bootstrap confidence interval, ‘P’ = percentile bootstrap confidence interval. The black horizontal line at .10 on the graphs represents the target type I error rate determined by the  $\alpha$ -level of .10, and the grey shaded region indicates Bradley’s liberal robustness criterion (.05 to .15). The  $x$ -axis is on the natural log scale.

Confidence Level = 80%

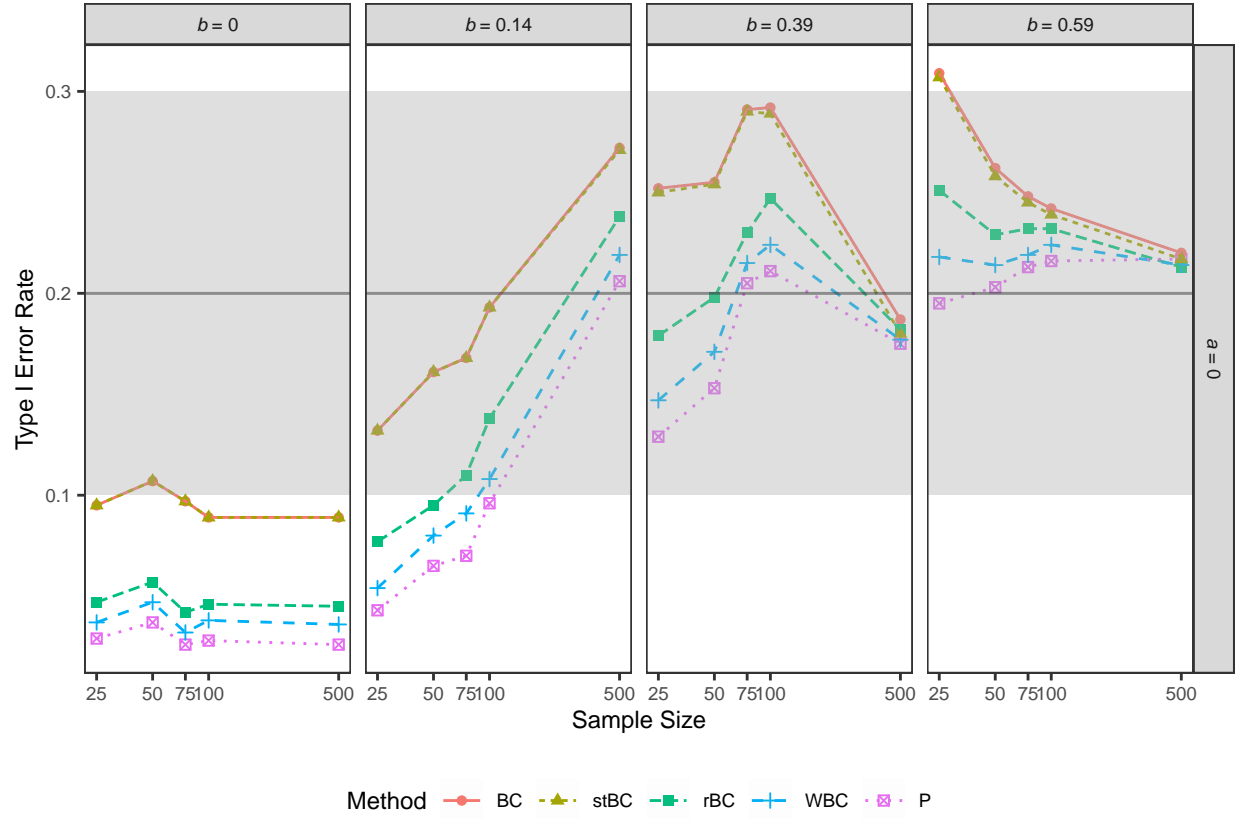

**SM Figure 3.** Type I error rate of all methods set at 80% confidence level when  $a$ -path is zero across the range of  $b$ -path sizes and sample sizes. *Note.* ‘BC’ = bias-corrected bootstrap confidence interval, ‘stBC’ = significance-tested bias-corrected bootstrap confidence interval, ‘rBC’ = reduced bias-corrected bootstrap confidence interval, ‘WBC’ = 30% Winsorized bias-corrected bootstrap confidence interval, ‘P’ = percentile bootstrap confidence interval. The black horizontal line at .20 on the graphs represents the target type I error rate determined by the  $\alpha$ -level of .20, and the grey shaded region indicates Bradley’s liberal robustness criterion (.10 to .30). The  $x$ -axis is on the natural log scale.

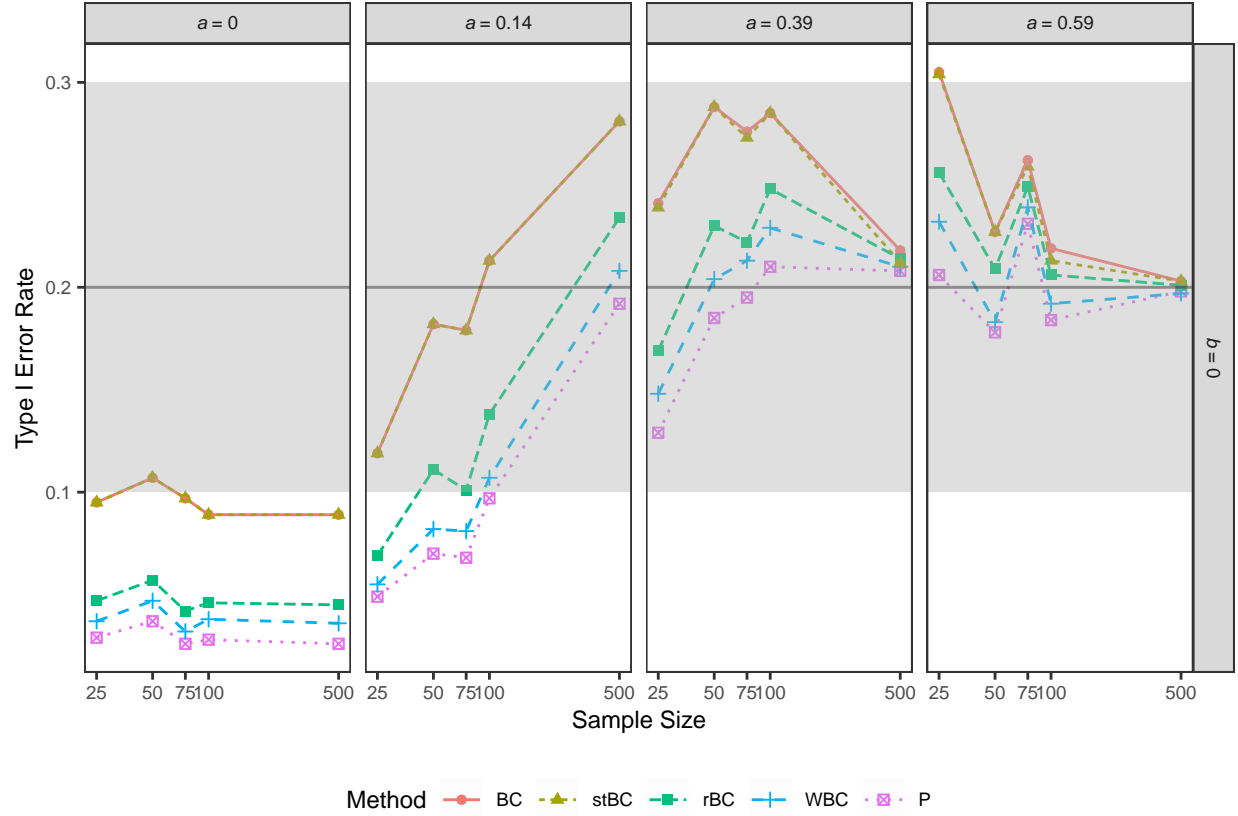

**SM Figure 4.** Type I error rate of all methods set at 80% confidence level when  $b$ -path is zero across the range of  $a$ -path sizes and sample sizes. *Note.* ‘BC’ = bias-corrected bootstrap confidence interval, ‘stBC’ = significance-tested bias-corrected bootstrap confidence interval, ‘rBC’ = reduced bias-corrected bootstrap confidence interval, ‘WBC’ = 30% Winsorized bias-corrected bootstrap confidence interval, ‘P’ = percentile bootstrap confidence interval. The black horizontal line at .20 on the graphs represents the target type I error rate determined by the  $\alpha$ -level of .20, and the grey shaded region indicates Bradley’s liberal robustness criterion (.10 to .30). The  $x$ -axis is on the natural log scale.

# Power Graphs

Confidence Level = 95%

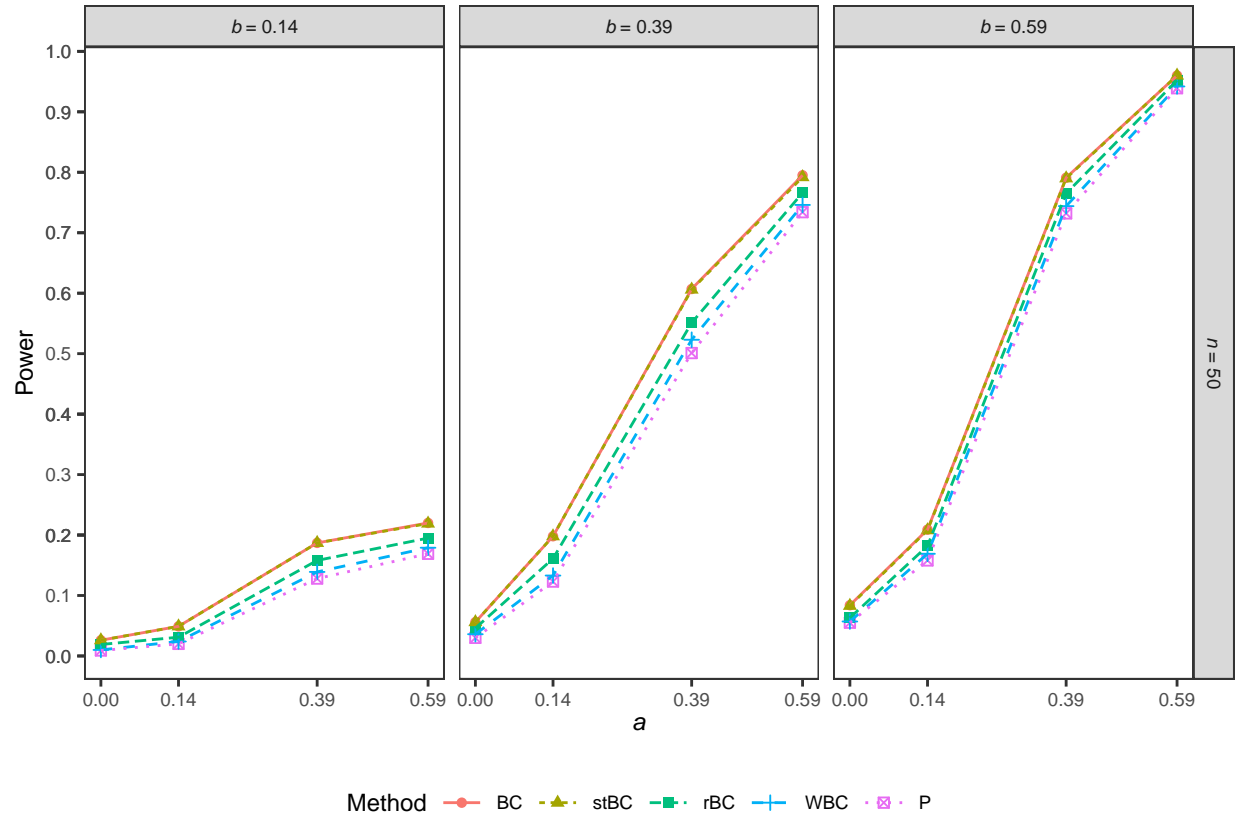

**SM Figure 5.** Power of all methods set at 95% confidence level when  $n = 50$  across the range of  $b$ -path sizes and  $a$ -path sizes. *Note.* ‘BC’ = bias-corrected bootstrap confidence interval, ‘stBC’ = significance-tested bias-corrected bootstrap confidence interval, ‘rBC’ = reduced bias-corrected bootstrap confidence interval, ‘WBC’ = 30% Winsorized bias-corrected bootstrap confidence interval, ‘P’ = percentile bootstrap confidence interval.

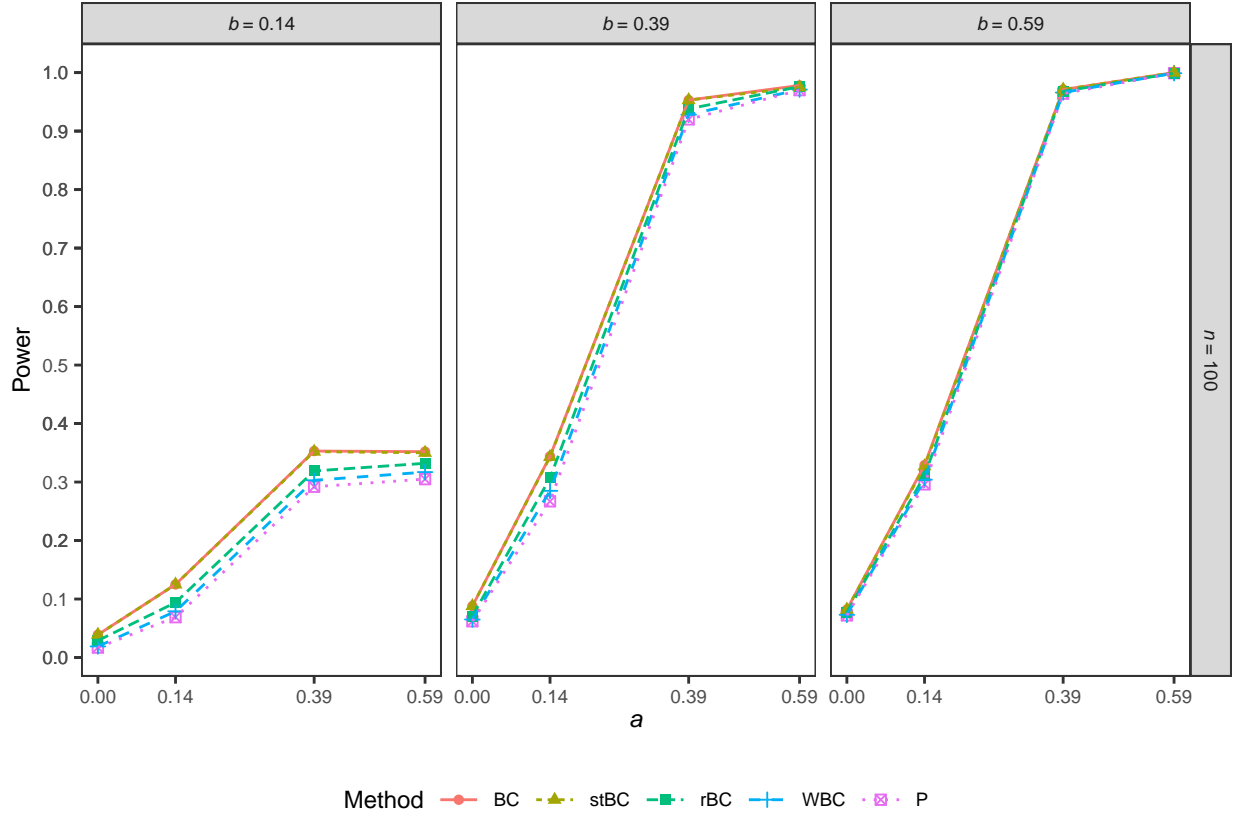

**SM Figure 6.** Power of all methods set at 95% confidence level when  $n = 100$  across the range of  $b$ -path sizes and  $a$ -path sizes. *Note.* ‘BC’ = bias-corrected bootstrap confidence interval, ‘stBC’ = significance-tested bias-corrected bootstrap confidence interval, ‘rBC’ = reduced bias-corrected bootstrap confidence interval, ‘WBC’ = 30% Winsorized bias-corrected bootstrap confidence interval, ‘P’ = percentile bootstrap confidence interval.

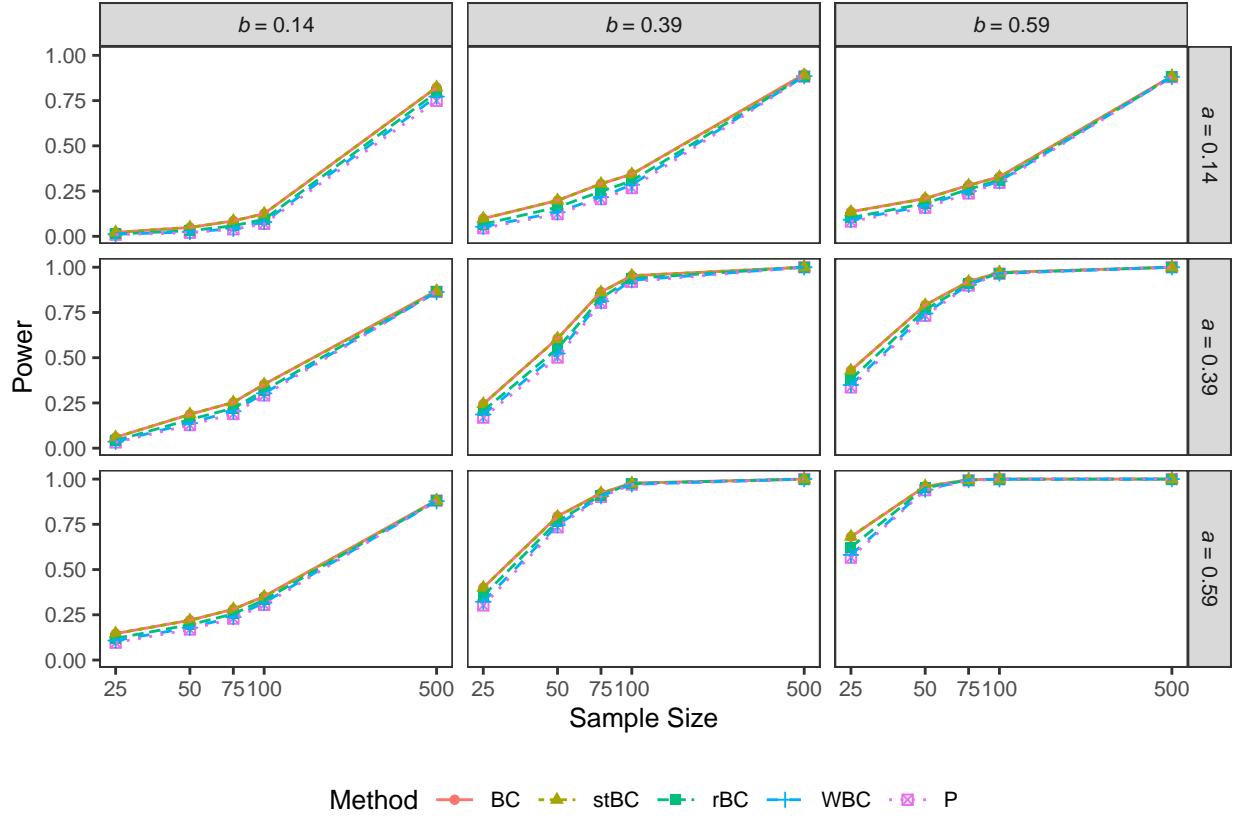

**SM Figure 7.** Chen and Fritz (2021)-style power graphs of all methods set at 95% confidence level across the range of  $a$ -path sizes,  $b$ -path sizes, and sample sizes. *Note.* ‘BC’ = bias-corrected bootstrap confidence interval, ‘stBC’ = significance-tested bias-corrected bootstrap confidence interval, ‘rBC’ = reduced bias-corrected bootstrap confidence interval, ‘WBC’ = 30% Winsorized bias-corrected bootstrap confidence interval, ‘P’ = percentile bootstrap confidence interval.



Confidence Level = 90%

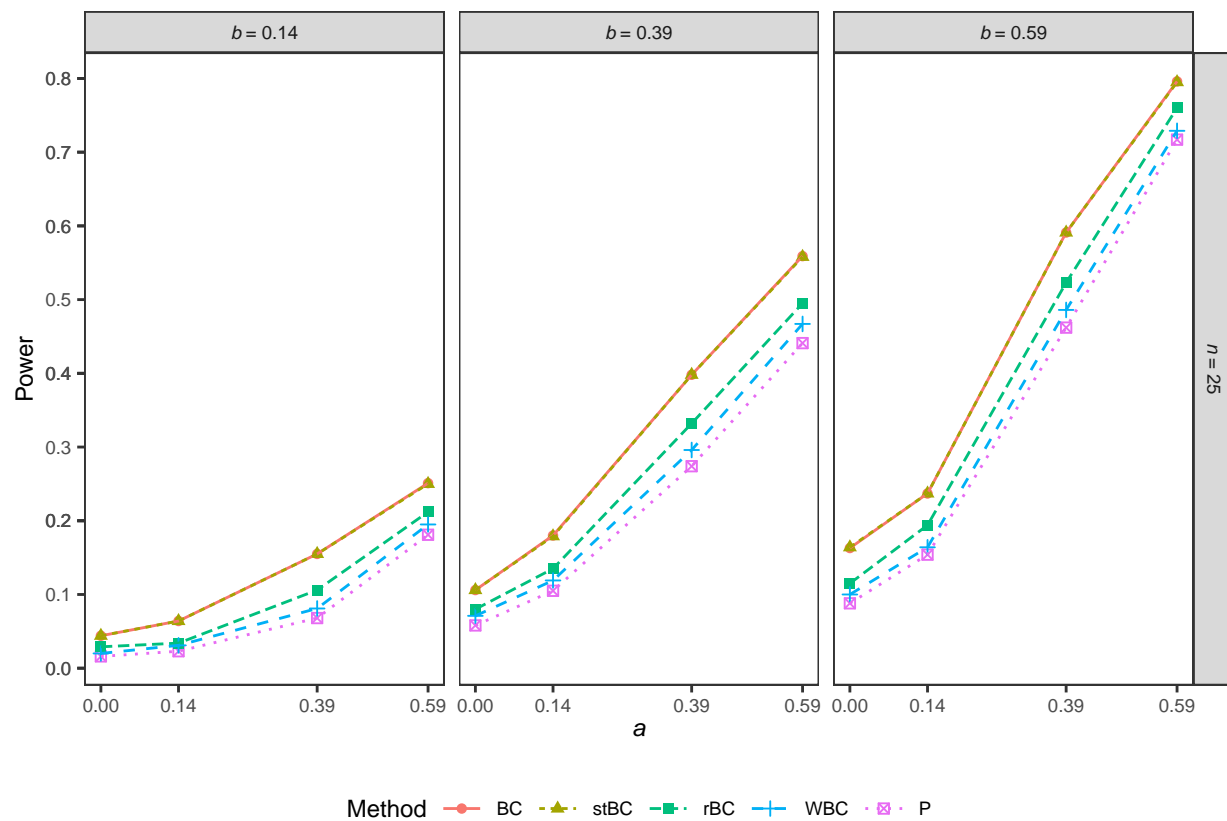

**SM Figure 8.** Power of all methods set at 90% confidence level when  $n = 25$  across the range of  $b$ -path sizes and  $a$ -path sizes. *Note.* ‘BC’ = bias-corrected bootstrap confidence interval, ‘stBC’ = significance-tested bias-corrected bootstrap confidence interval, ‘rBC’ = reduced bias-corrected bootstrap confidence interval, ‘WBC’ = 30% Winsorized bias-corrected bootstrap confidence interval, ‘P’ = percentile bootstrap confidence interval.

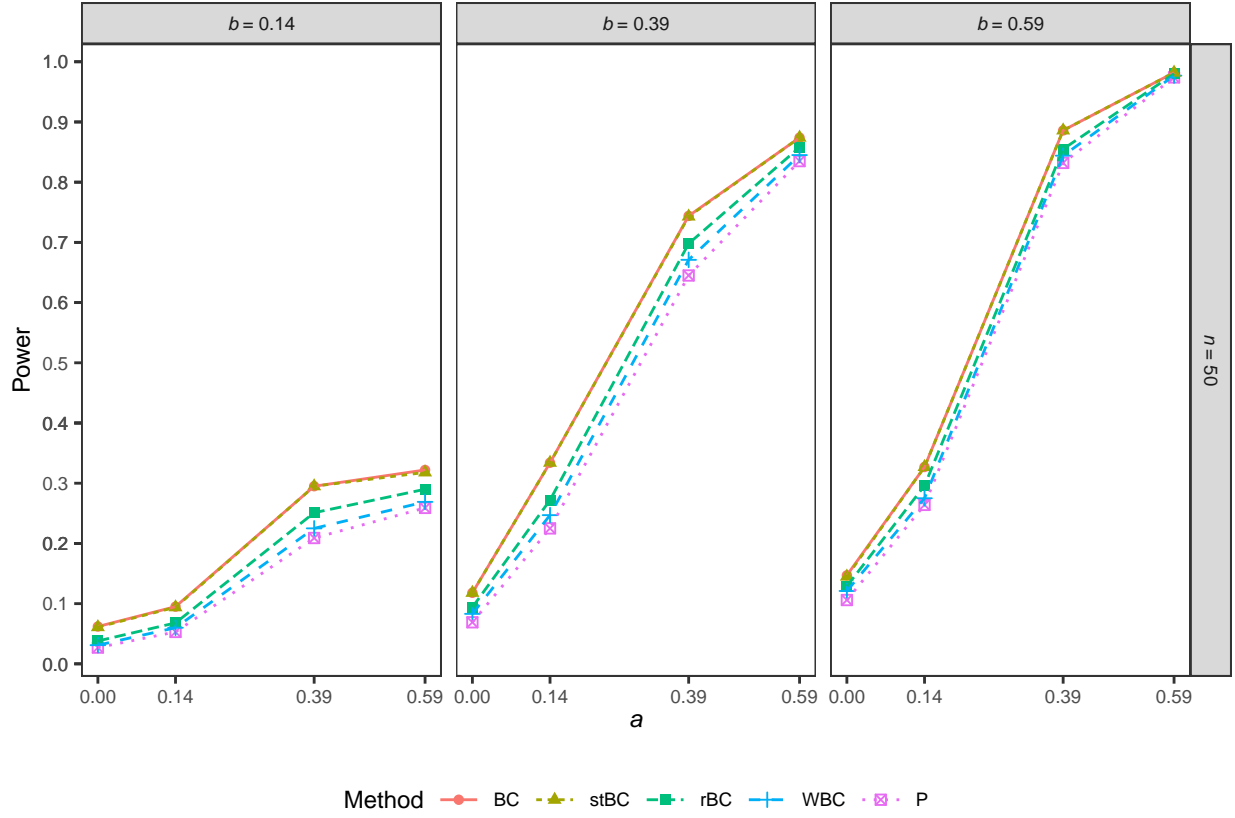

**SM Figure 9.** Power of all methods set at 90% confidence level when  $n = 50$  across the range of  $b$ -path sizes and  $a$ -path sizes. *Note.* ‘BC’ = bias-corrected bootstrap confidence interval, ‘stBC’ = significance-tested bias-corrected bootstrap confidence interval, ‘rBC’ = reduced bias-corrected bootstrap confidence interval, ‘WBC’ = 30% Winsorized bias-corrected bootstrap confidence interval, ‘P’ = percentile bootstrap confidence interval.

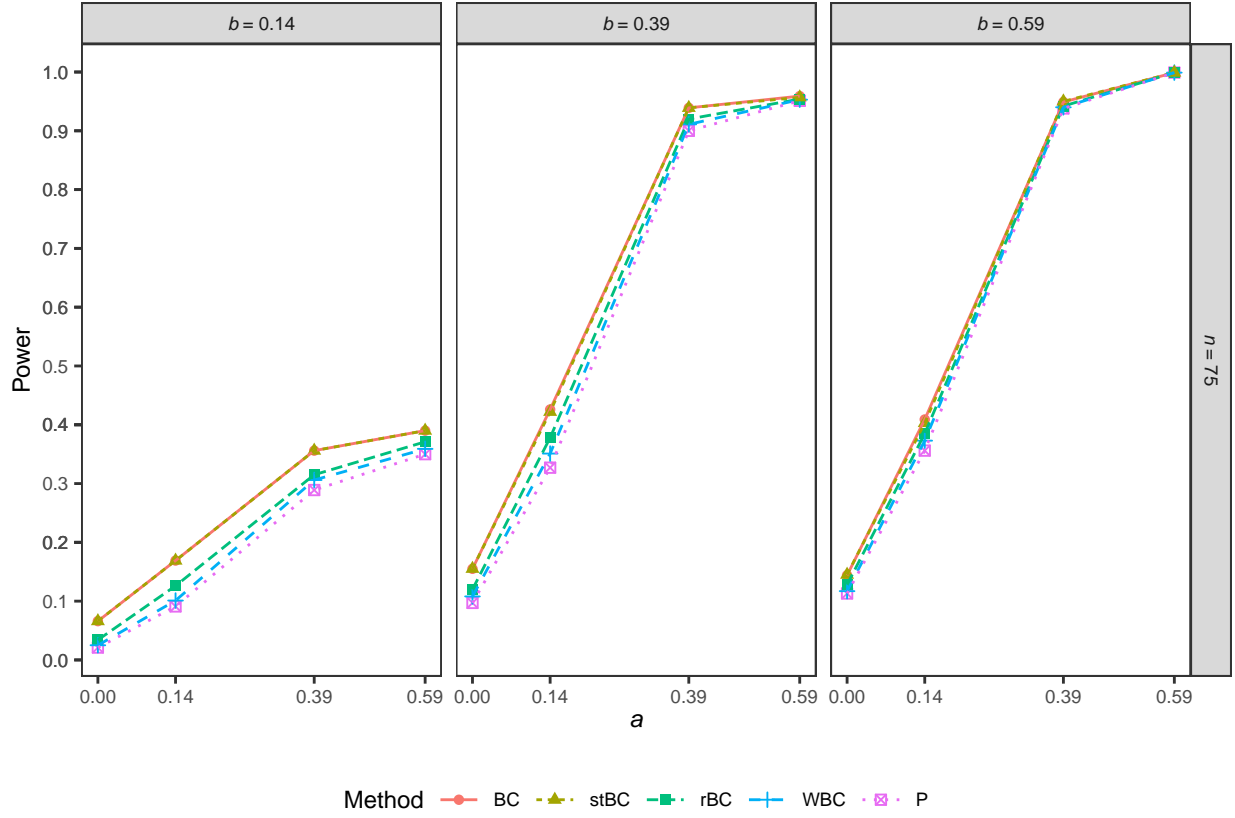

**SM Figure 10.** Power of all methods set at 90% confidence level when  $n = 75$  across the range of  $b$ -path sizes and  $a$ -path sizes. *Note.* ‘BC’ = bias-corrected bootstrap confidence interval, ‘stBC’ = significance-tested bias-corrected bootstrap confidence interval, ‘rBC’ = reduced bias-corrected bootstrap confidence interval, ‘WBC’ = 30% Winsorized bias-corrected bootstrap confidence interval, ‘P’ = percentile bootstrap confidence interval.

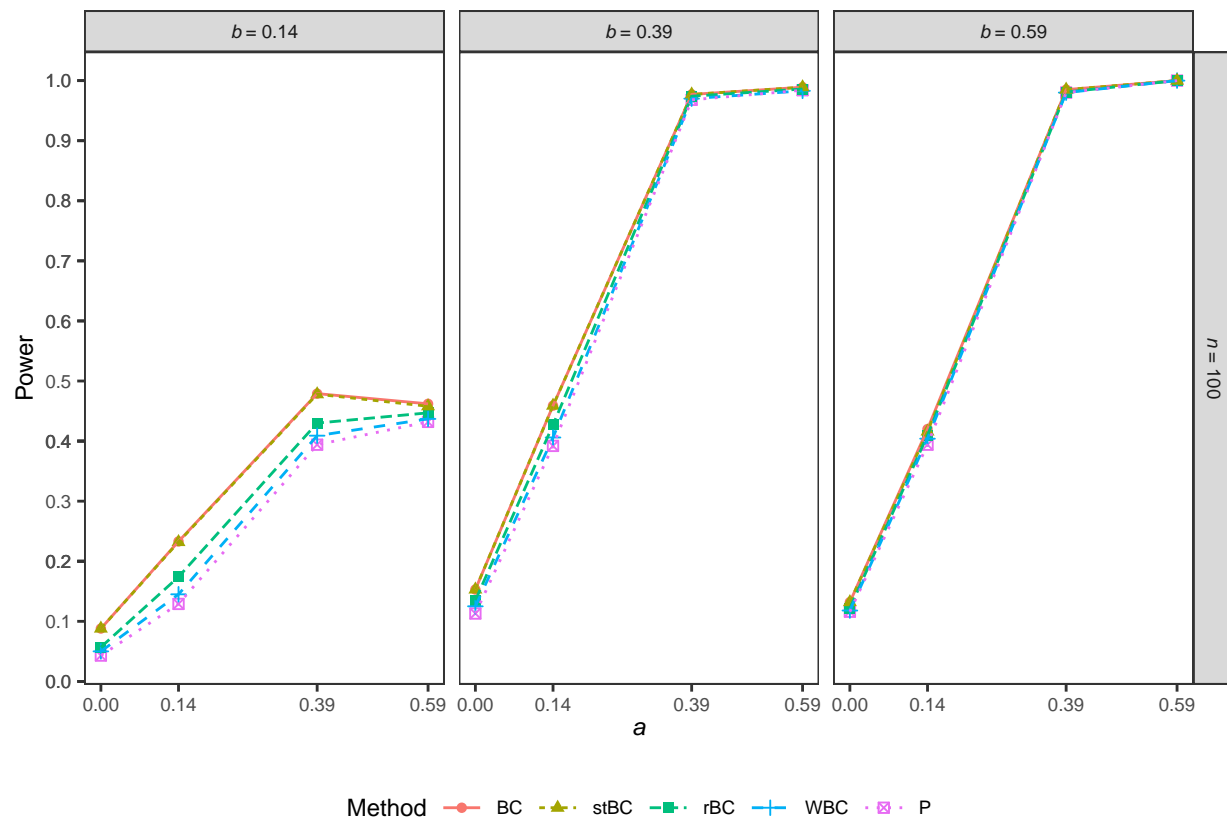

**SM Figure 11.** Power of all methods set at 90% confidence level when  $n = 100$  across the range of  $b$ -path sizes and  $a$ -path sizes. *Note.* ‘BC’ = bias-corrected bootstrap confidence interval, ‘stBC’ = significance-tested bias-corrected bootstrap confidence interval, ‘rBC’ = reduced bias-corrected bootstrap confidence interval, ‘WBC’ = 30% Winsorized bias-corrected bootstrap confidence interval, ‘P’ = percentile bootstrap confidence interval.

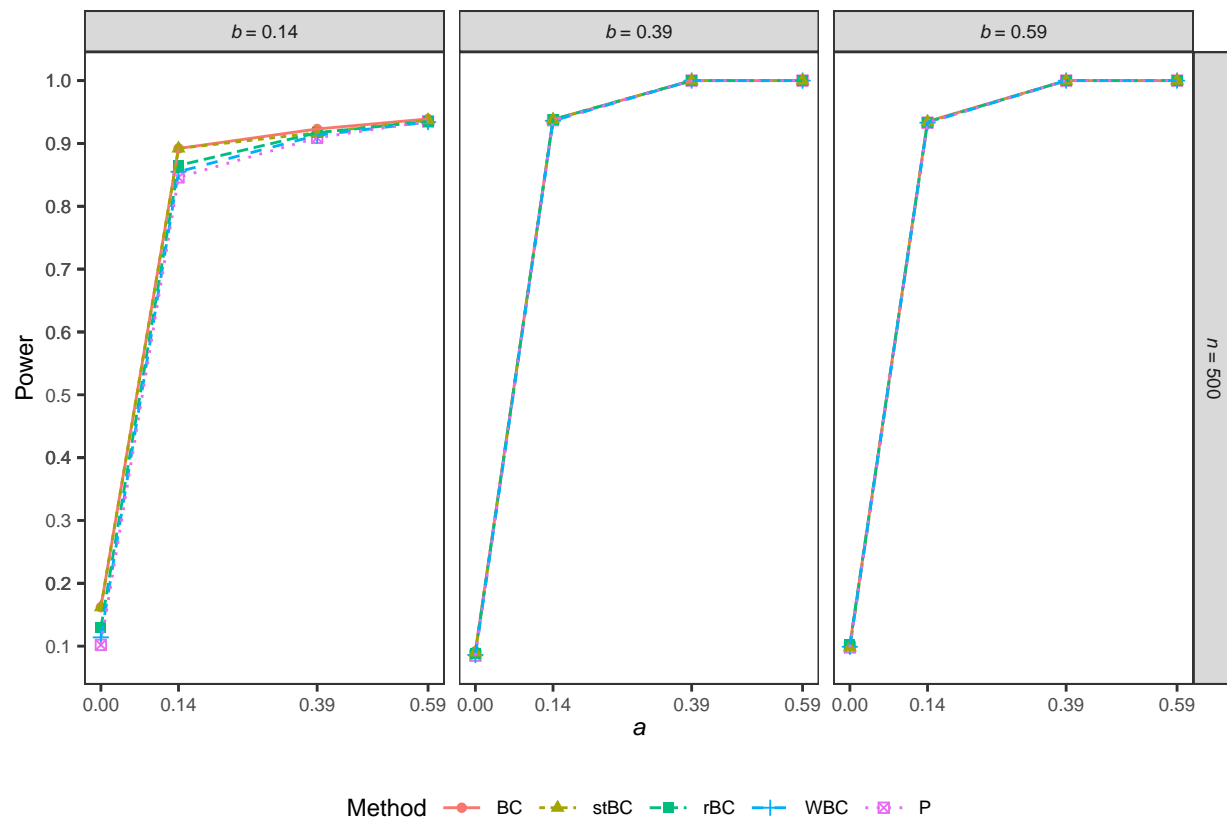

**SM Figure 12.** Power of all methods set at 90% confidence level when  $n = 500$  across the range of  $b$ -path sizes and  $a$ -path sizes. *Note.* ‘BC’ = bias-corrected bootstrap confidence interval, ‘stBC’ = significance-tested bias-corrected bootstrap confidence interval, ‘rBC’ = reduced bias-corrected bootstrap confidence interval, ‘WBC’ = 30% Winsorized bias-corrected bootstrap confidence interval, ‘P’ = percentile bootstrap confidence interval.

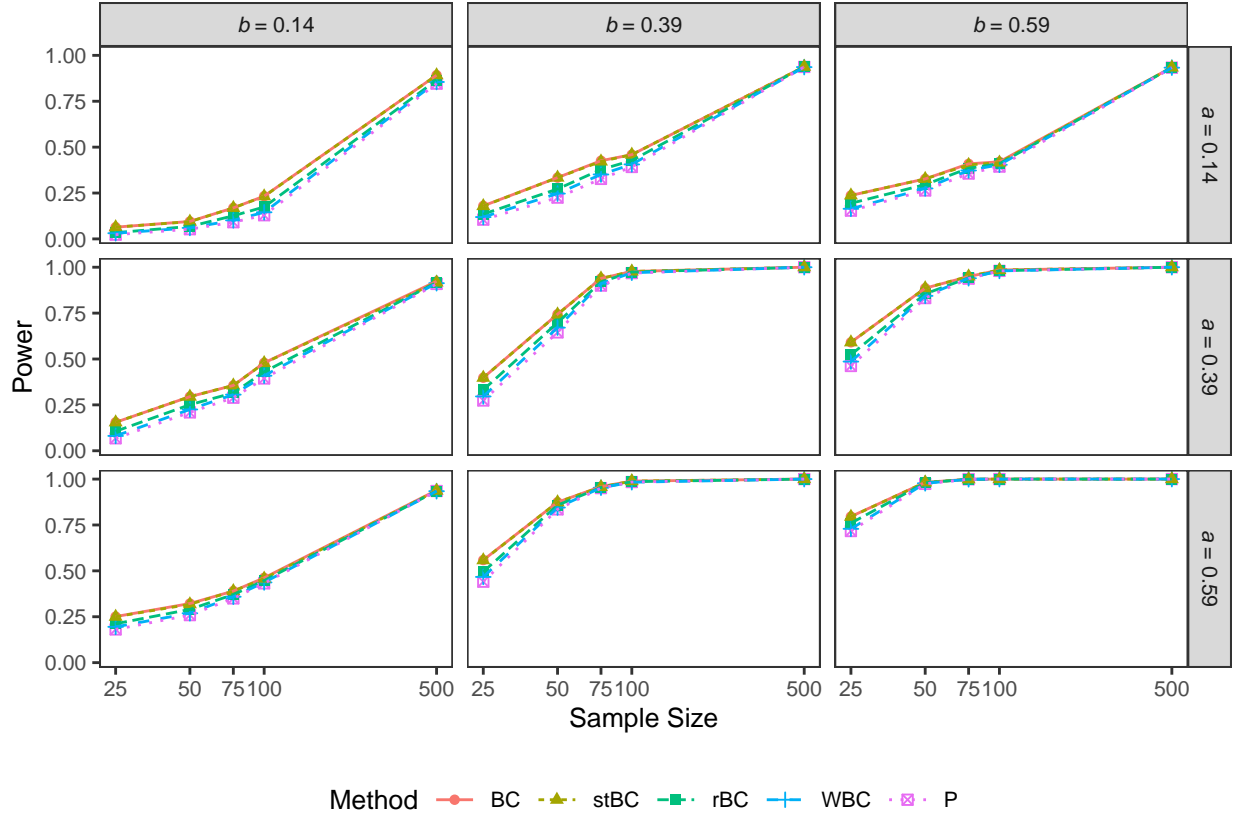

**SM Figure 13.** Chen and Fritz (2021)-style power graphs of all methods set at 90% confidence level across the range of  $a$ -path sizes,  $b$ -path sizes, and sample sizes. *Note.* ‘BC’ = bias-corrected bootstrap confidence interval, ‘stBC’ = significance-tested bias-corrected bootstrap confidence interval, ‘rBC’ = reduced bias-corrected bootstrap confidence interval, ‘WBC’ = 30% Winsorized bias-corrected bootstrap confidence interval, ‘P’ = percentile bootstrap confidence interval.

Confidence Level = 80%

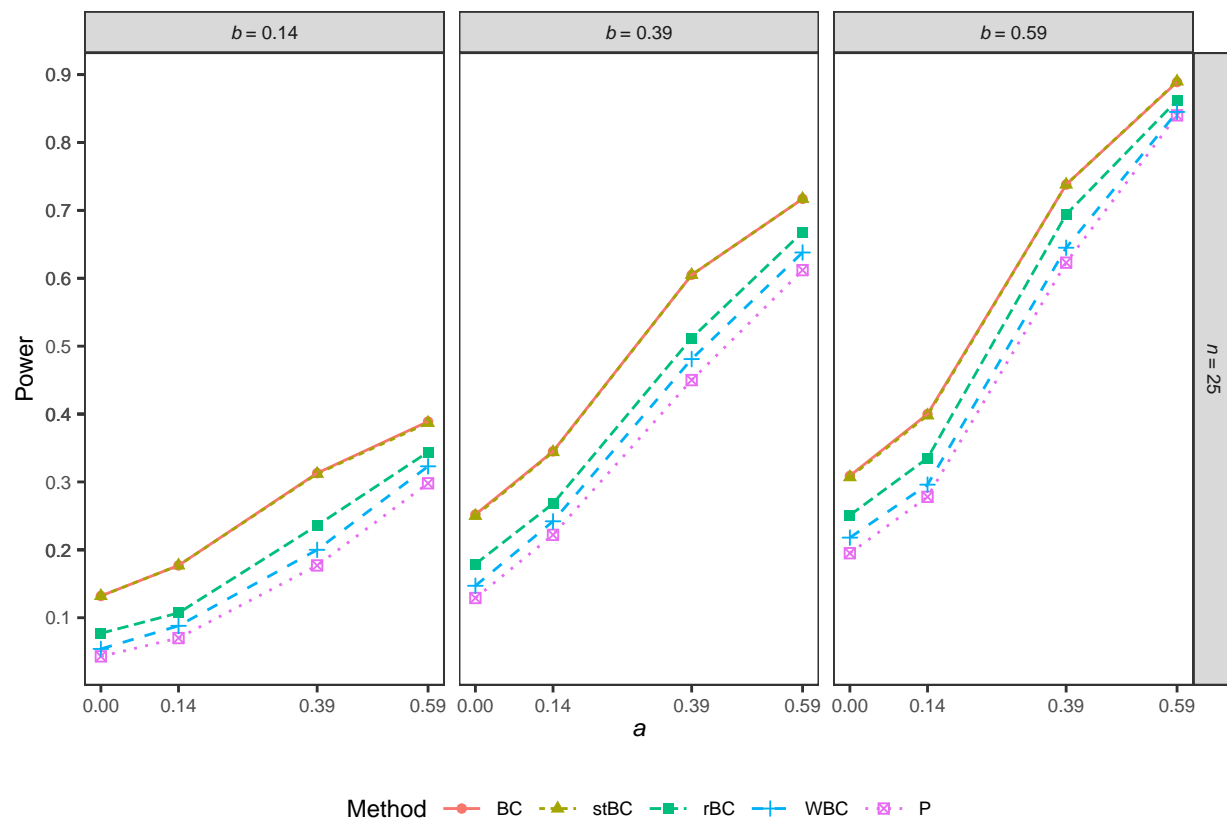

**SM Figure 14.** Power of all methods set at 80% confidence level when  $n = 25$  across the range of  $b$ -path sizes and  $a$ -path sizes. *Note.* ‘BC’ = bias-corrected bootstrap confidence interval, ‘stBC’ = significance-tested bias-corrected bootstrap confidence interval, ‘rBC’ = reduced bias-corrected bootstrap confidence interval, ‘WBC’ = 30% Winsorized bias-corrected bootstrap confidence interval, ‘P’ = percentile bootstrap confidence interval.

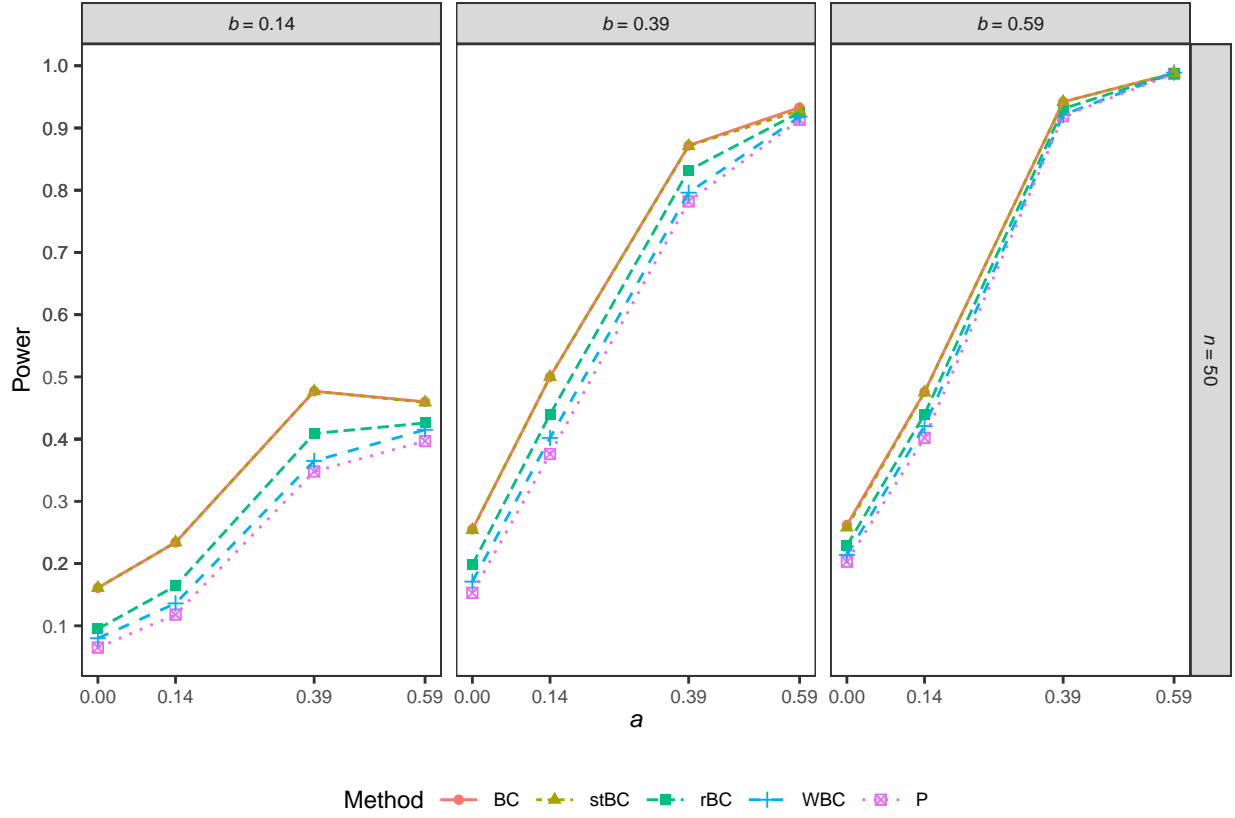

**SM Figure 15.** Power of all methods set at 80% confidence level when  $n = 50$  across the range of  $b$ -path sizes and  $a$ -path sizes. *Note.* ‘BC’ = bias-corrected bootstrap confidence interval, ‘stBC’ = significance-tested bias-corrected bootstrap confidence interval, ‘rBC’ = reduced bias-corrected bootstrap confidence interval, ‘WBC’ = 30% Winsorized bias-corrected bootstrap confidence interval, ‘P’ = percentile bootstrap confidence interval.



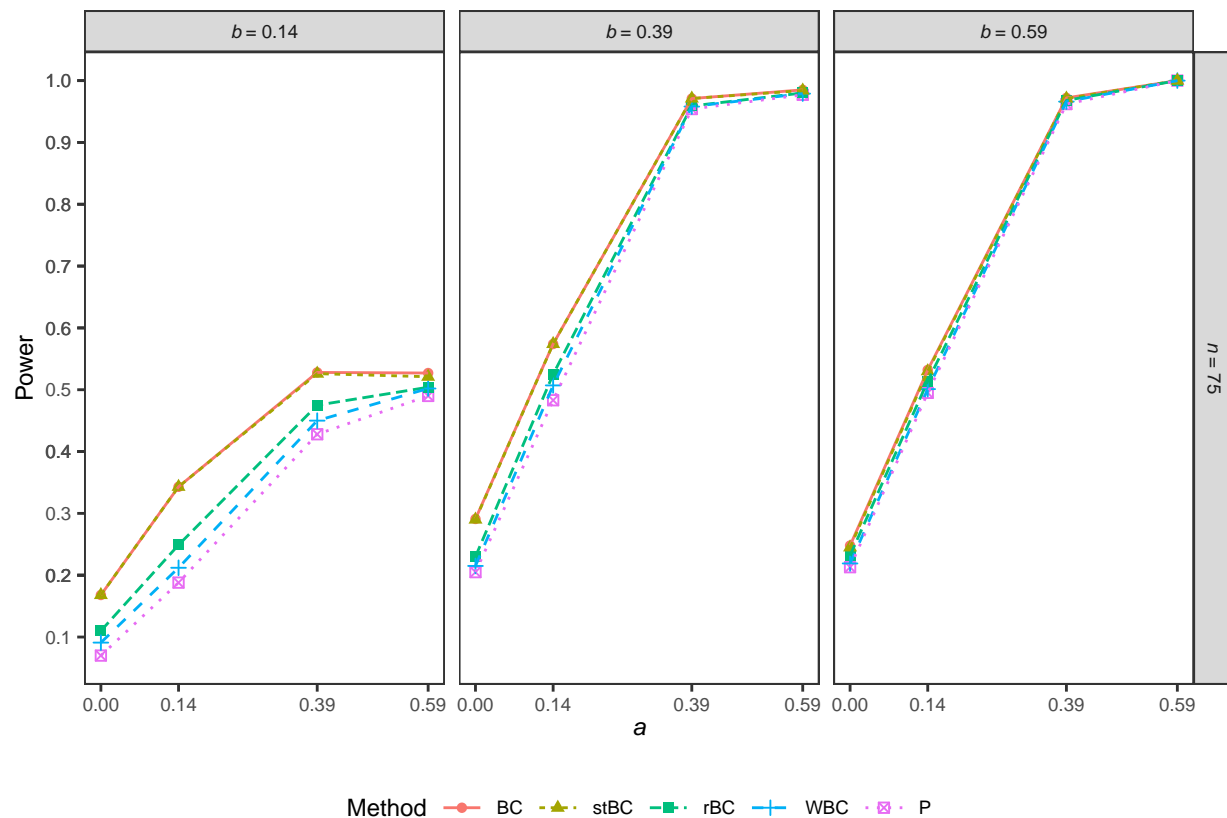

**SM Figure 16.** Power of all methods set at 80% confidence level when  $n = 75$  across the range of  $b$ -path sizes and  $a$ -path sizes. *Note.* ‘BC’ = bias-corrected bootstrap confidence interval, ‘stBC’ = significance-tested bias-corrected bootstrap confidence interval, ‘rBC’ = reduced bias-corrected bootstrap confidence interval, ‘WBC’ = 30% Winsorized bias-corrected bootstrap confidence interval, ‘P’ = percentile bootstrap confidence interval.

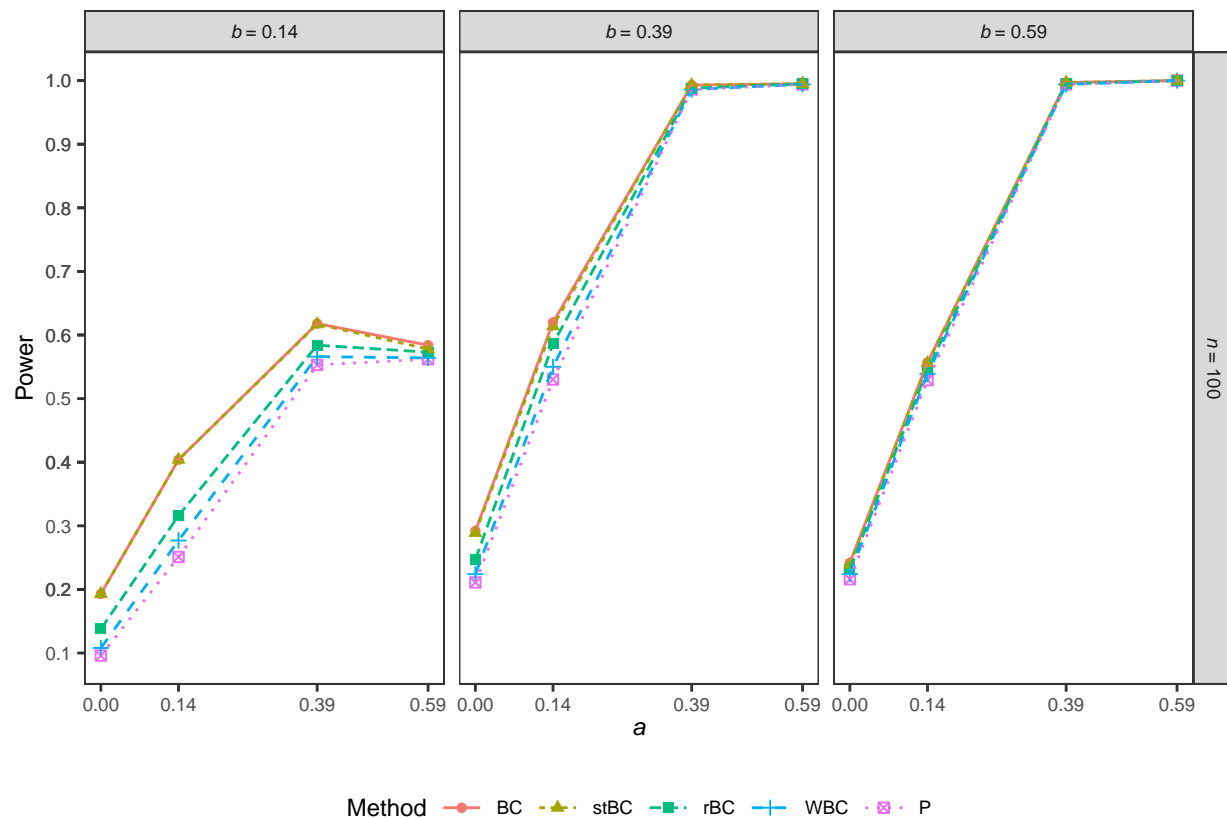

**SM Figure 17.** Power of all methods set at 80% confidence level when  $n = 100$  across the range of  $b$ -path sizes and  $a$ -path sizes. *Note.* ‘BC’ = bias-corrected bootstrap confidence interval, ‘stBC’ = significance-tested bias-corrected bootstrap confidence interval, ‘rBC’ = reduced bias-corrected bootstrap confidence interval, ‘WBC’ = 30% Winsorized bias-corrected bootstrap confidence interval, ‘P’ = percentile bootstrap confidence interval.

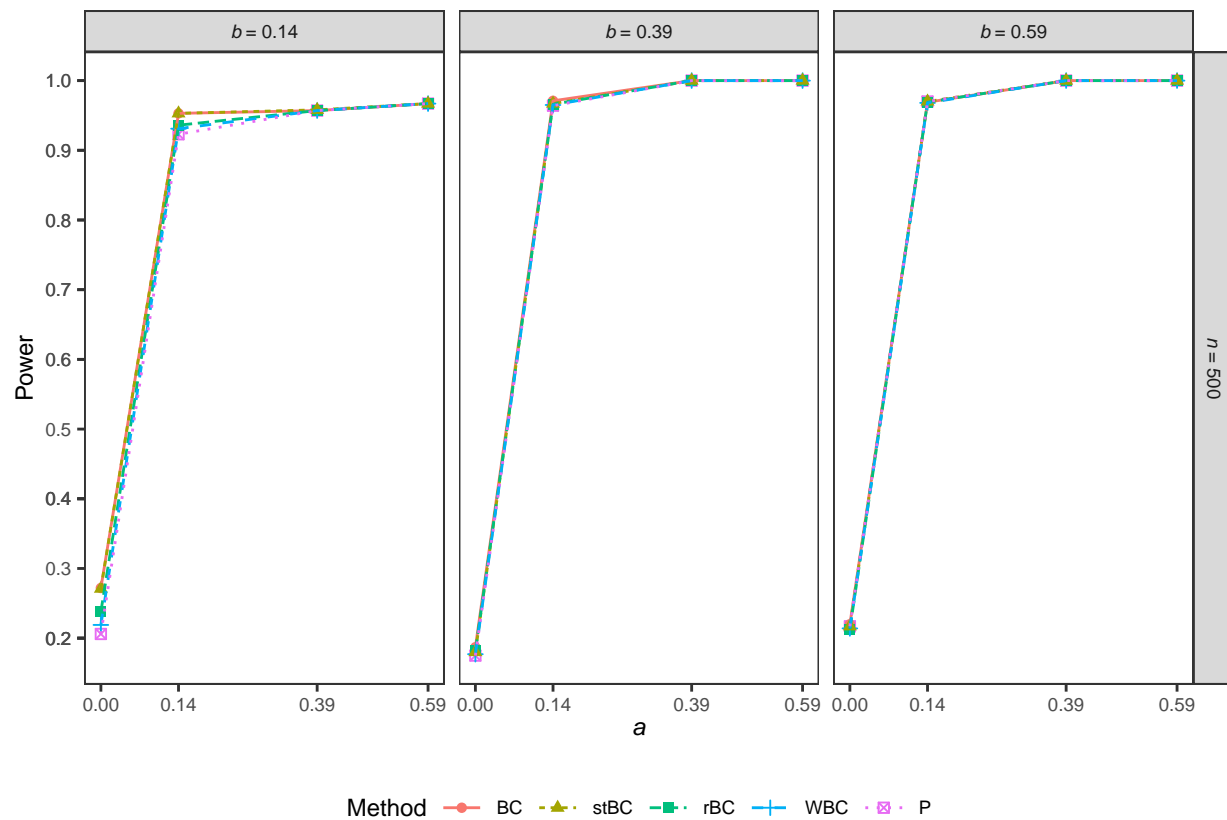

**SM Figure 18.** Power of all methods set at 80% confidence level when  $n = 500$  across the range of  $b$ -path sizes and  $a$ -path sizes. *Note.* ‘BC’ = bias-corrected bootstrap confidence interval, ‘stBC’ = significance-tested bias-corrected bootstrap confidence interval, ‘rBC’ = reduced bias-corrected bootstrap confidence interval, ‘WBC’ = 30% Winsorized bias-corrected bootstrap confidence interval, ‘P’ = percentile bootstrap confidence interval.

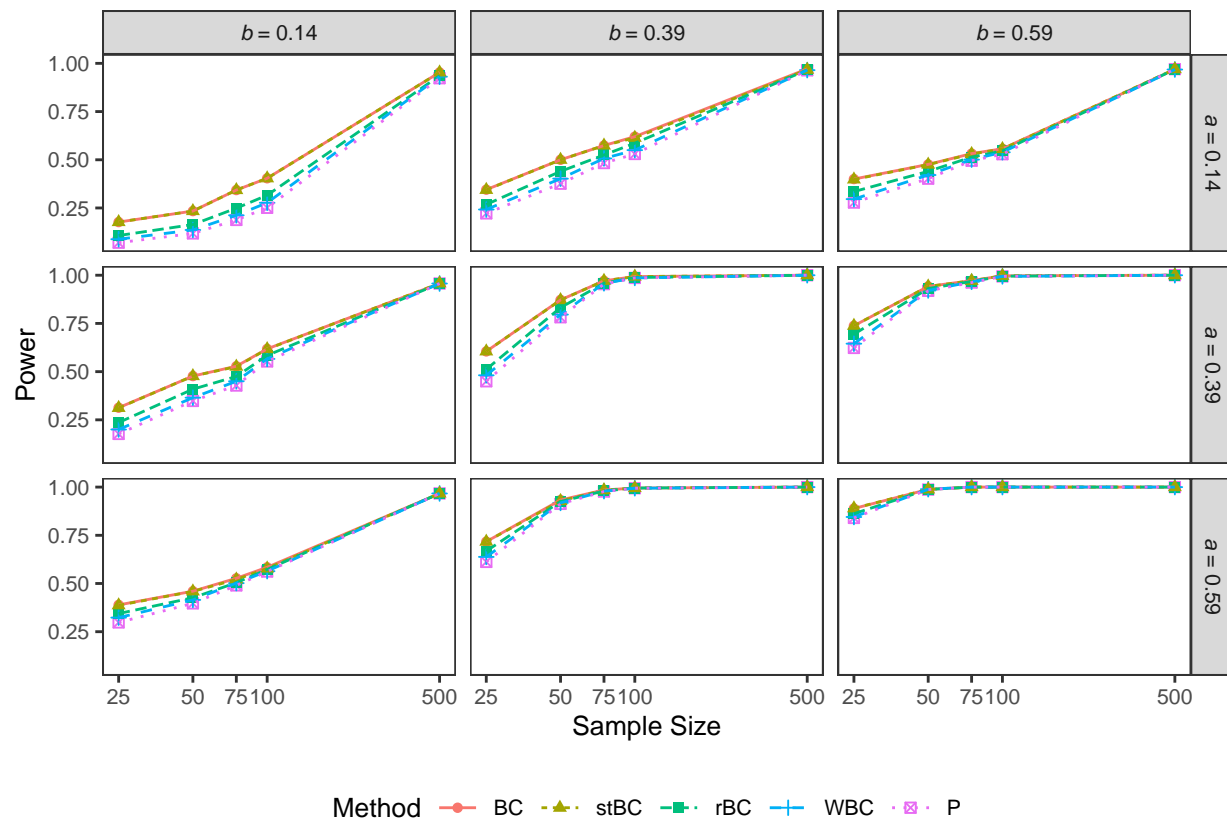

**SM Figure 19.** Chen and Fritz (2021)-style power graphs of all methods set at 80% confidence level across the range of  $a$ -path sizes,  $b$ -path sizes, and sample sizes. *Note.* ‘BC’ = bias-corrected bootstrap confidence interval, ‘stBC’ = significance-tested bias-corrected bootstrap confidence interval, ‘rBC’ = reduced bias-corrected bootstrap confidence interval, ‘WBC’ = 30% Winsorized bias-corrected bootstrap confidence interval, ‘P’ = percentile bootstrap confidence interval.

## Balance Graphs

Confidence Level = 90%

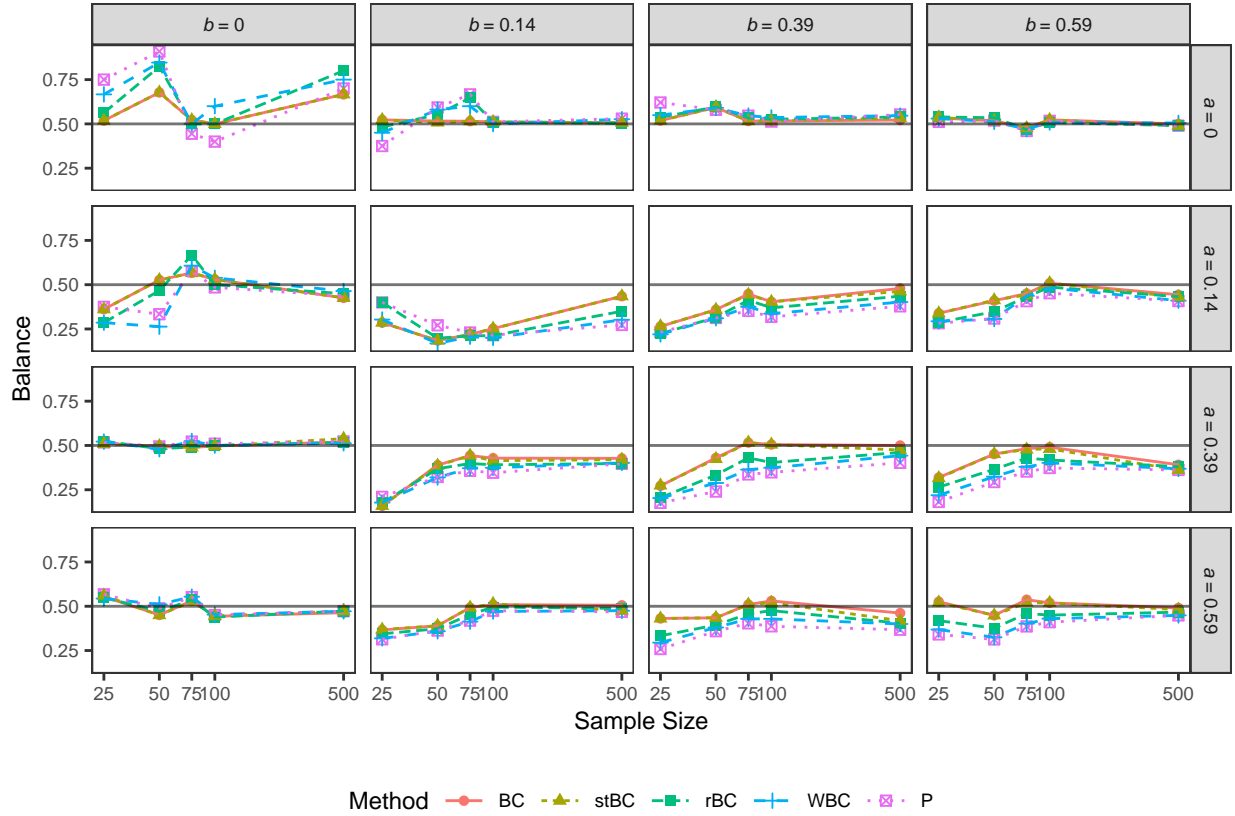

**SM Figure 20.** Balance of all methods set at 90% confidence level across the range of  $a$ -path sizes,  $b$ -path sizes, and sample sizes. *Note.* ‘BC’ = bias-corrected bootstrap confidence interval, ‘stBC’ = significance-tested bias-corrected bootstrap confidence interval, ‘rBC’ = reduced bias-corrected bootstrap confidence interval, ‘WBC’ = 30% Winsorized bias-corrected bootstrap confidence interval, ‘P’ = percentile bootstrap confidence interval. The black horizontal line at .50 on the graphs represents perfect balance. The  $x$ -axis is on the natural log scale.

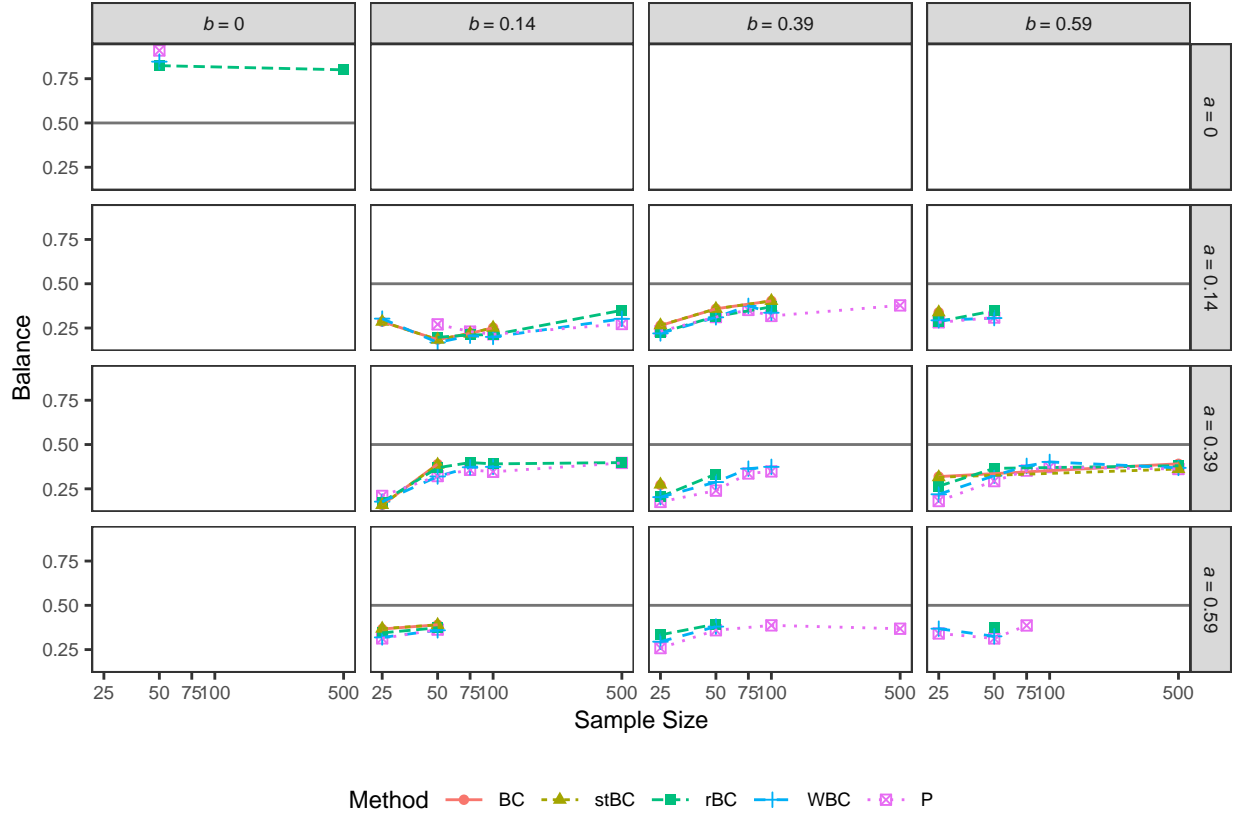

**SM Figure 21.** Balance of all methods set at 90% confidence level that are significant at  $\alpha = 0.05$  across the range of  $a$ -path sizes,  $b$ -path sizes, and sample sizes. *Note.* ‘BC’ = bias-corrected bootstrap confidence interval, ‘stBC’ = significance-tested bias-corrected bootstrap confidence interval, ‘rBC’ = reduced bias-corrected bootstrap confidence interval, ‘WBC’ = 30% Winsorized bias-corrected bootstrap confidence interval, ‘P’ = percentile bootstrap confidence interval. The black horizontal line at .50 on the graphs represents the null hypothesis of perfect balance. The  $x$ -axis is on the natural log scale.

Confidence Level = 80%

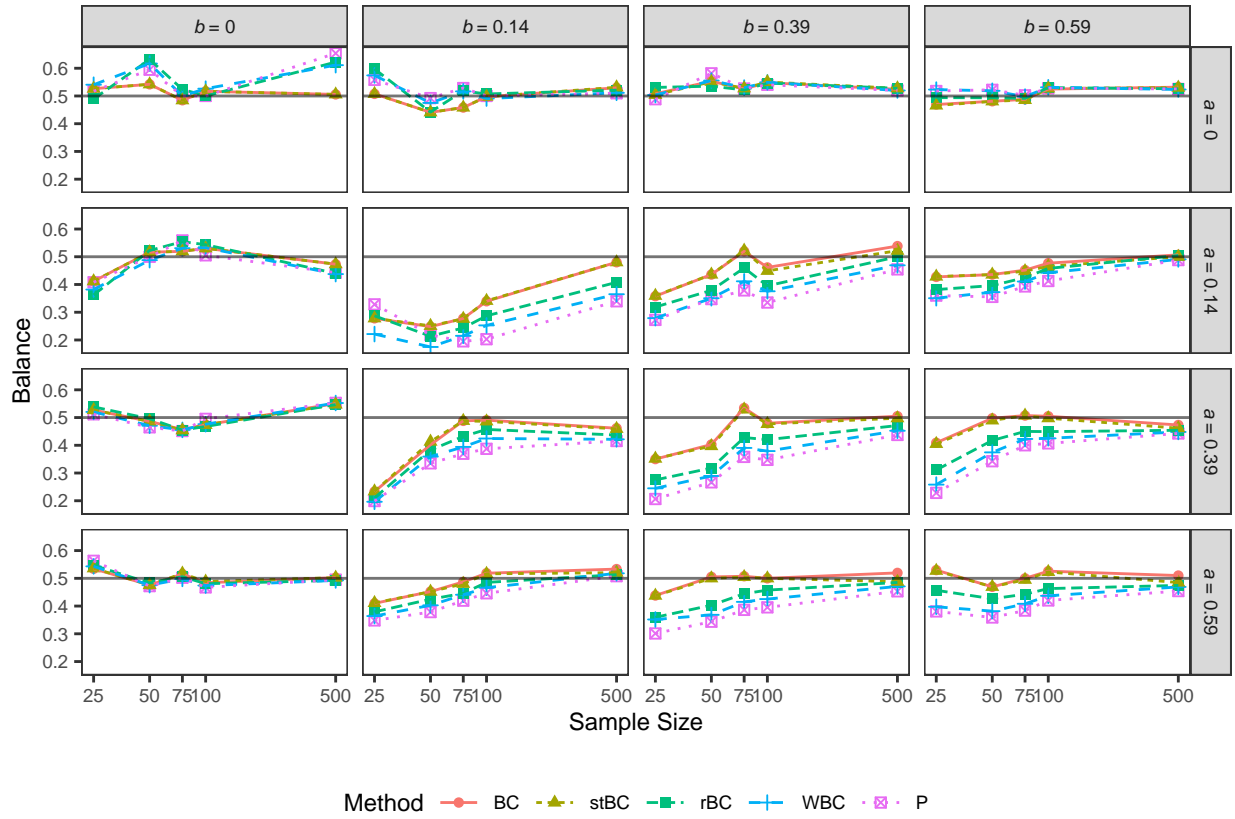

**SM Figure 22.** Balance of all methods set at 80% confidence level across the range of  $a$ -path sizes,  $b$ -path sizes, and sample sizes. *Note.* ‘BC’ = bias-corrected bootstrap confidence interval, ‘stBC’ = significance-tested bias-corrected bootstrap confidence interval, ‘rBC’ = reduced bias-corrected bootstrap confidence interval, ‘WBC’ = 30% Winsorized bias-corrected bootstrap confidence interval, ‘P’ = percentile bootstrap confidence interval. The black horizontal line at .50 on the graphs represents perfect balance. The  $x$ -axis is on the natural log scale.

```
## geom_path: Each group consists of only one observation. Do you need to adjust
## the group aesthetic?
```

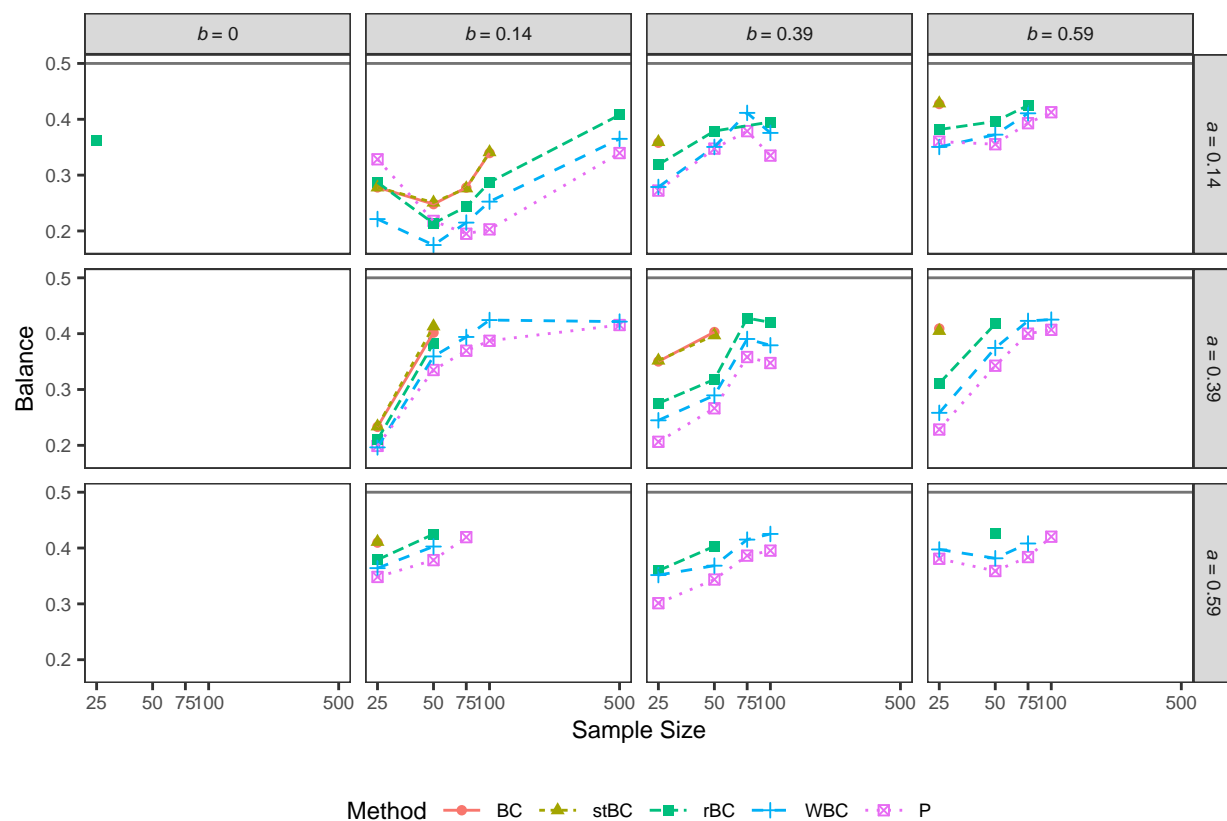

**SM Figure 23.** Balance of all methods set at 80% confidence level that are significant at  $\alpha = 0.05$  across the range of  $a$ -path sizes,  $b$ -path sizes, and sample sizes. *Note.* ‘BC’ = bias-corrected bootstrap confidence interval, ‘stBC’ = significance-tested bias-corrected bootstrap confidence interval, ‘rBC’ = reduced bias-corrected bootstrap confidence interval, ‘WBC’ = 30% Winsorized bias-corrected bootstrap confidence interval, ‘P’ = percentile bootstrap confidence interval. The black horizontal line at .50 on the graphs represents the null hypothesis of perfect balance. The  $x$ -axis is on the natural log scale.



## Power/Balance Graphs Controlling for Type I Error Rate

Confidence Level = 95%

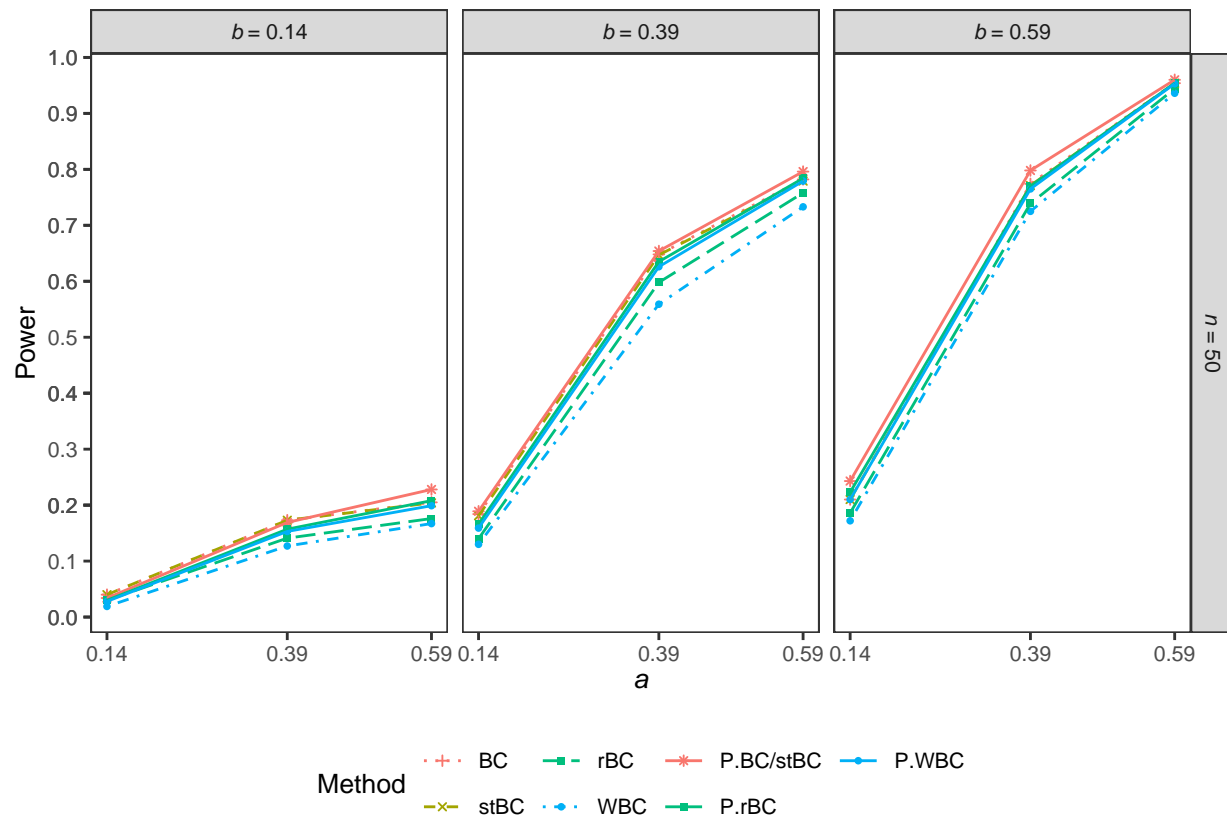

**SM Figure 24.** Power of all methods set at 95% confidence level compared to PBCI controlling for type I error rate when  $n = 50$  across the range of  $b$ -path sizes and  $a$ -path sizes. *Note.* 'BC' = bias-corrected bootstrap confidence interval, 'stBC' = significance-tested bias-corrected bootstrap confidence interval, 'rBC' = reduced bias-corrected bootstrap confidence interval, 'WBC' = 30% Winsorized bias-corrected bootstrap confidence interval, 'P.BC/stBC' = comparison percentile bootstrap confidence interval for BC and stBC, 'P.rBC' = comparison percentile bootstrap confidence interval for rBC, 'P.WBC' = comparison percentile bootstrap confidence interval for WBC.

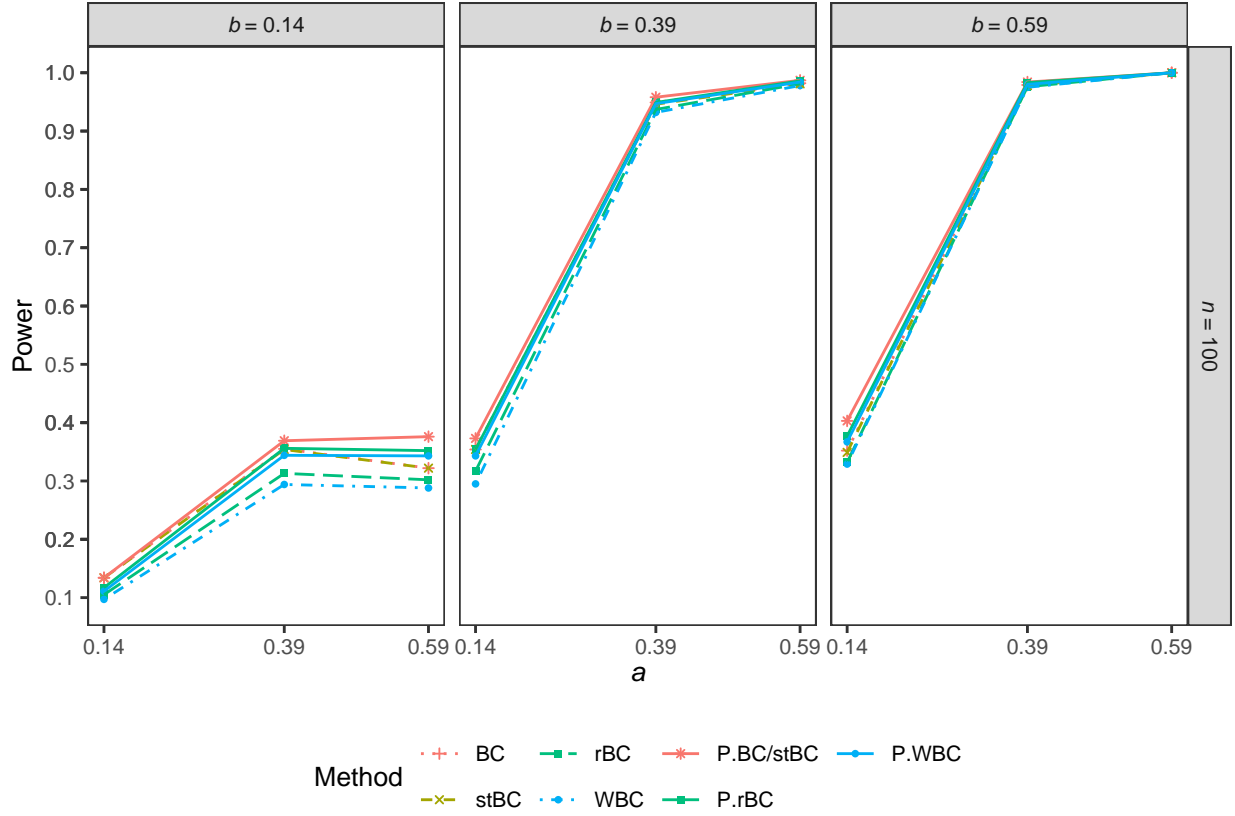

**SM Figure 25.** Power of all methods set at 95% confidence level compared to PBCI controlling for type I error rate when  $n = 100$  across the range of  $b$ -path sizes and  $a$ -path sizes. *Note.* ‘BC’ = bias-corrected bootstrap confidence interval, ‘stBC’ = significance-tested bias-corrected bootstrap confidence interval, ‘rBC’ = reduced bias-corrected bootstrap confidence interval, ‘WBC’ = 30% Winsorized bias-corrected bootstrap confidence interval, ‘P.BC/stBC’ = comparison percentile bootstrap confidence interval for BC and stBC, ‘P.rBC’ = comparison percentile bootstrap confidence interval for rBC, ‘P.WBC’ = comparison percentile bootstrap confidence interval for WBC.

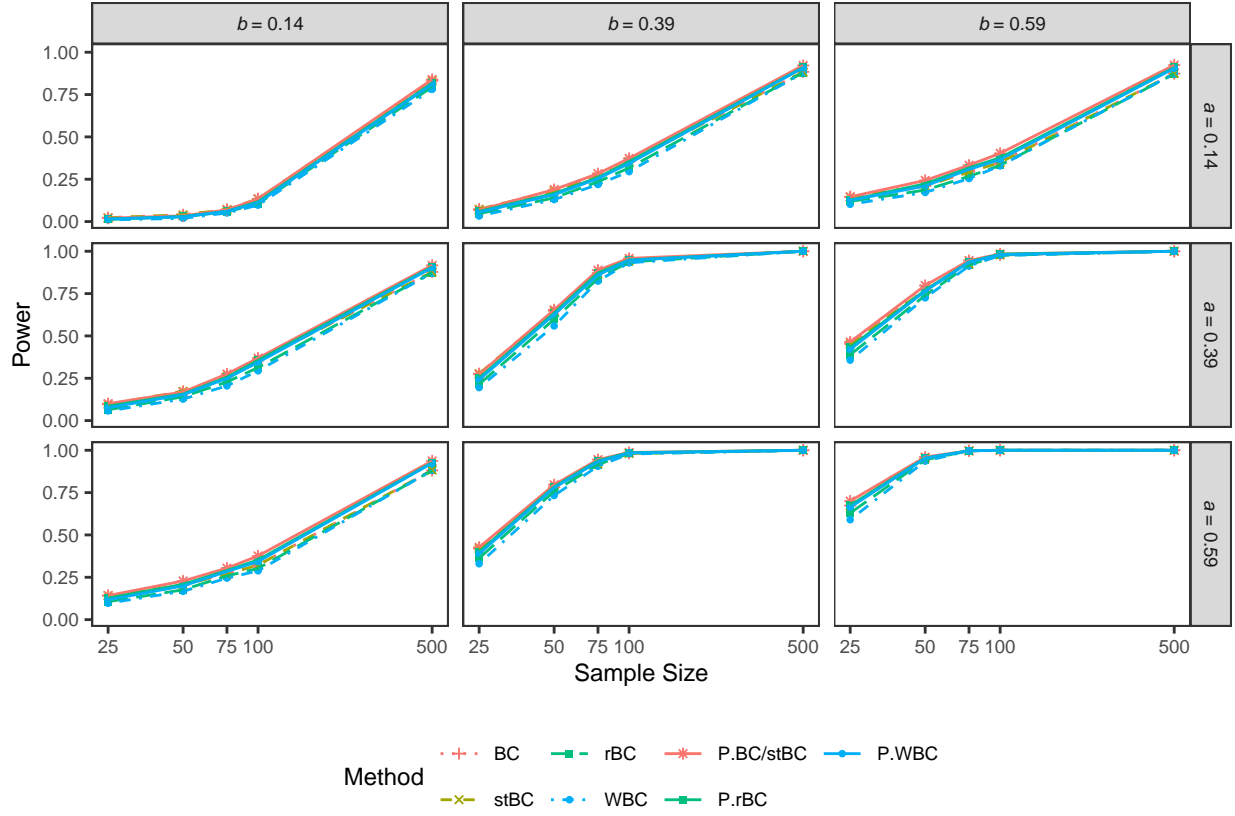

**SM Figure 26.** Chen and Fritz (2021)-style power graphs of all methods set at 95% confidence level compared to PBCI controlling for type I error rate across the range of  $a$ -path sizes,  $b$ -path sizes, and sample sizes. *Note.* ‘BC’ = bias-corrected bootstrap confidence interval, ‘stBC’ = significance-tested bias-corrected bootstrap confidence interval, ‘rBC’ = reduced bias-corrected bootstrap confidence interval, ‘WBC’ = 30% Winsorized bias-corrected bootstrap confidence interval, ‘P.BC/stBC’ = comparison percentile bootstrap confidence interval for BC and stBC, ‘P.rBC’ = comparison percentile bootstrap confidence interval for rBC, ‘P.WBC’ = comparison percentile bootstrap confidence interval for WBC.

```
##
##      BCBCI  BCBCI.PBCI      PBCI      rBCBCI rBCBCI.PBCI      stBCBCI
##      16      34      25      18      31      17
##      WBCBCI WBCBCI.PBCI
##      26      31
```

```
## geom_path: Each group consists of only one observation. Do you need to adjust
## the group aesthetic?
```

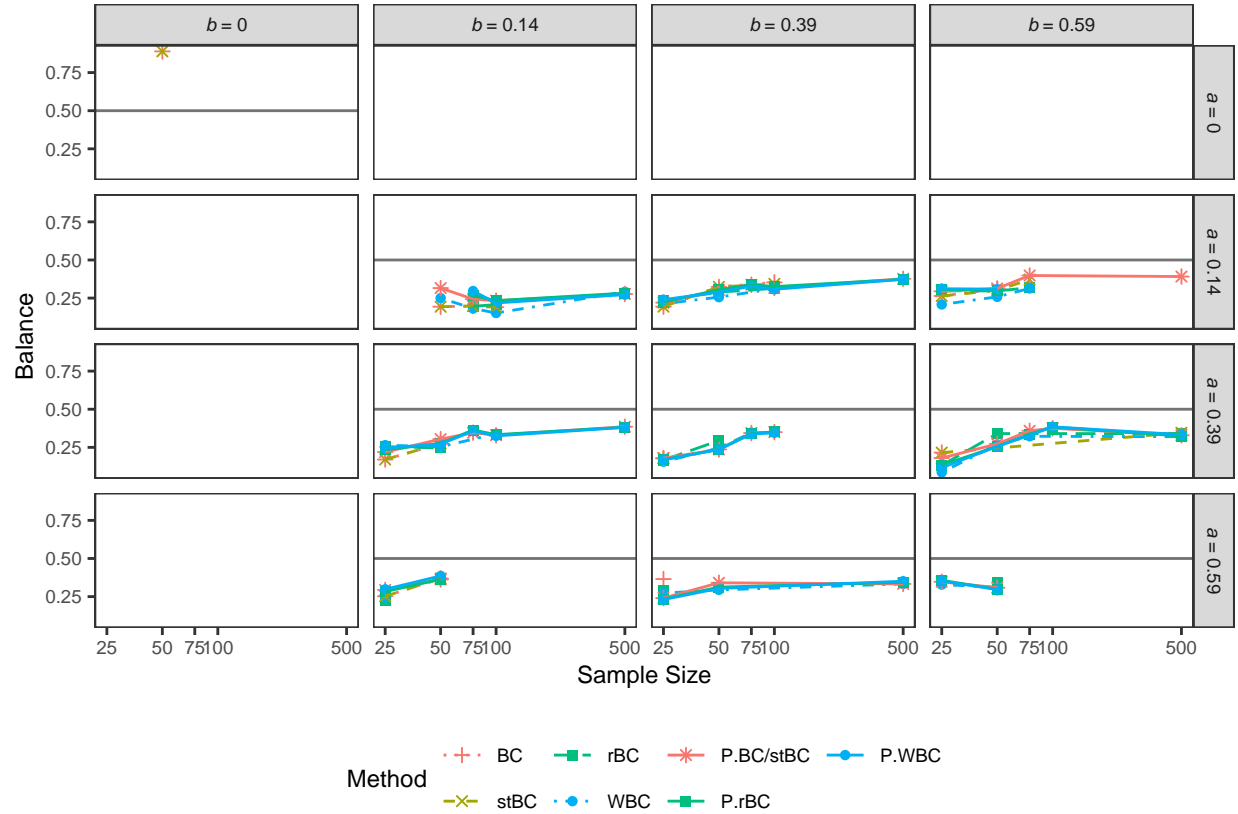

**SM Figure 27.** Balance of all methods set at 95% confidence level compared to PBCI controlling for type I error rate that are significant at  $\alpha = 0.05$  across the range of  $a$ -path sizes,  $b$ -path sizes, and sample sizes. *Note.* ‘BC’ = bias-corrected bootstrap confidence interval, ‘stBC’ = significance-tested bias-corrected bootstrap confidence interval, ‘rBC’ = reduced bias-corrected bootstrap confidence interval, ‘WBC’ = 30% Winsorized bias-corrected bootstrap confidence interval, ‘P’ = percentile bootstrap confidence interval. The black horizontal line at .50 on the graphs represents the null hypothesis of perfect balance. The  $x$ -axis is on the natural log scale. *Note.* ‘BC’ = bias-corrected bootstrap confidence interval, ‘stBC’ = significance-tested bias-corrected bootstrap confidence interval, ‘rBC’ = reduced bias-corrected bootstrap confidence interval, ‘WBC’ = 30% Winsorized bias-corrected bootstrap confidence interval, ‘P.BC/stBC’ = comparison percentile bootstrap confidence interval for BC and stBC, ‘P.rBC’ = comparison percentile bootstrap confidence interval for rBC, ‘P.WBC’ = comparison percentile bootstrap confidence interval for WBC.

## Coverage Graphs

Confidence Level = 95%

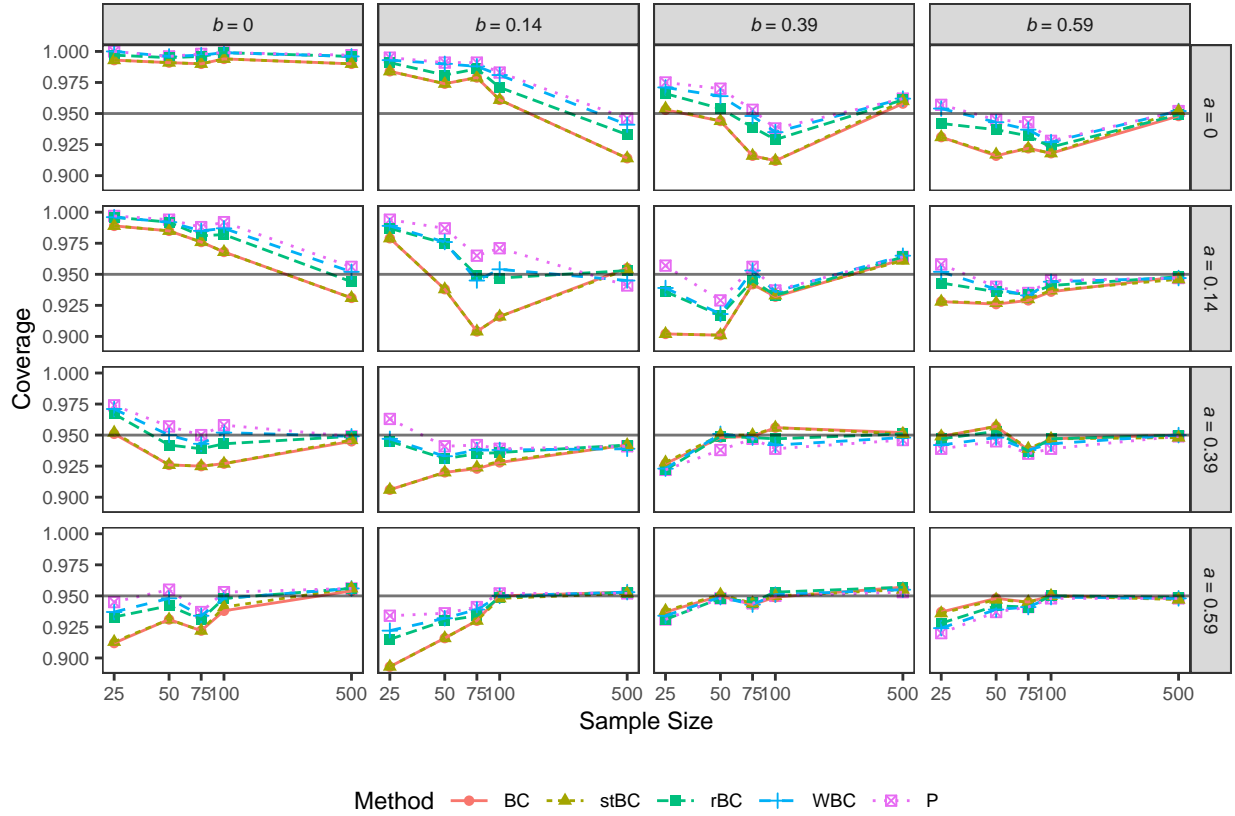

**SM Figure 28.** Coverage of all methods set at 95% confidence level across the range of  $a$ -path sizes,  $b$ -path sizes, and sample sizes. *Note.* ‘BC’ = bias-corrected bootstrap confidence interval, ‘stBC’ = significance-tested bias-corrected bootstrap confidence interval, ‘rBC’ = reduced bias-corrected bootstrap confidence interval, ‘WBC’ = 30% Winsorized bias-corrected bootstrap confidence interval, ‘P’ = percentile bootstrap confidence interval. The black horizontal line at .95 on the graphs represents target coverage. The  $x$ -axis is on the natural log scale.

Confidence Level = 90%

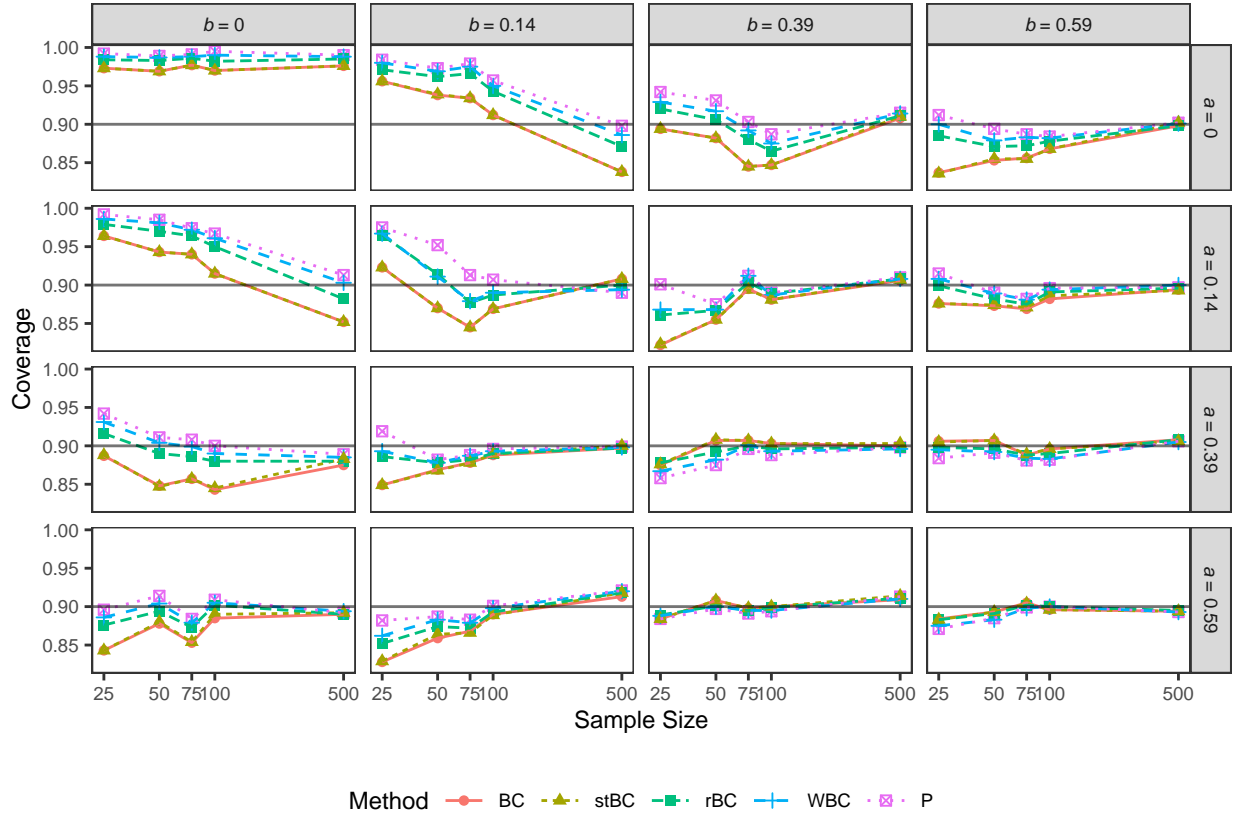

**SM Figure 29.** Coverage of all methods set at 90% confidence level across the range of  $a$ -path sizes,  $b$ -path sizes, and sample sizes. *Note.* ‘BC’ = bias-corrected bootstrap confidence interval, ‘stBC’ = significance-tested bias-corrected bootstrap confidence interval, ‘rBC’ = reduced bias-corrected bootstrap confidence interval, ‘WBC’ = 30% Winsorized bias-corrected bootstrap confidence interval, ‘P’ = percentile bootstrap confidence interval. The black horizontal line at .90 on the graphs represents target coverage. The  $x$ -axis is on the natural log scale.

Confidence Level = 80%

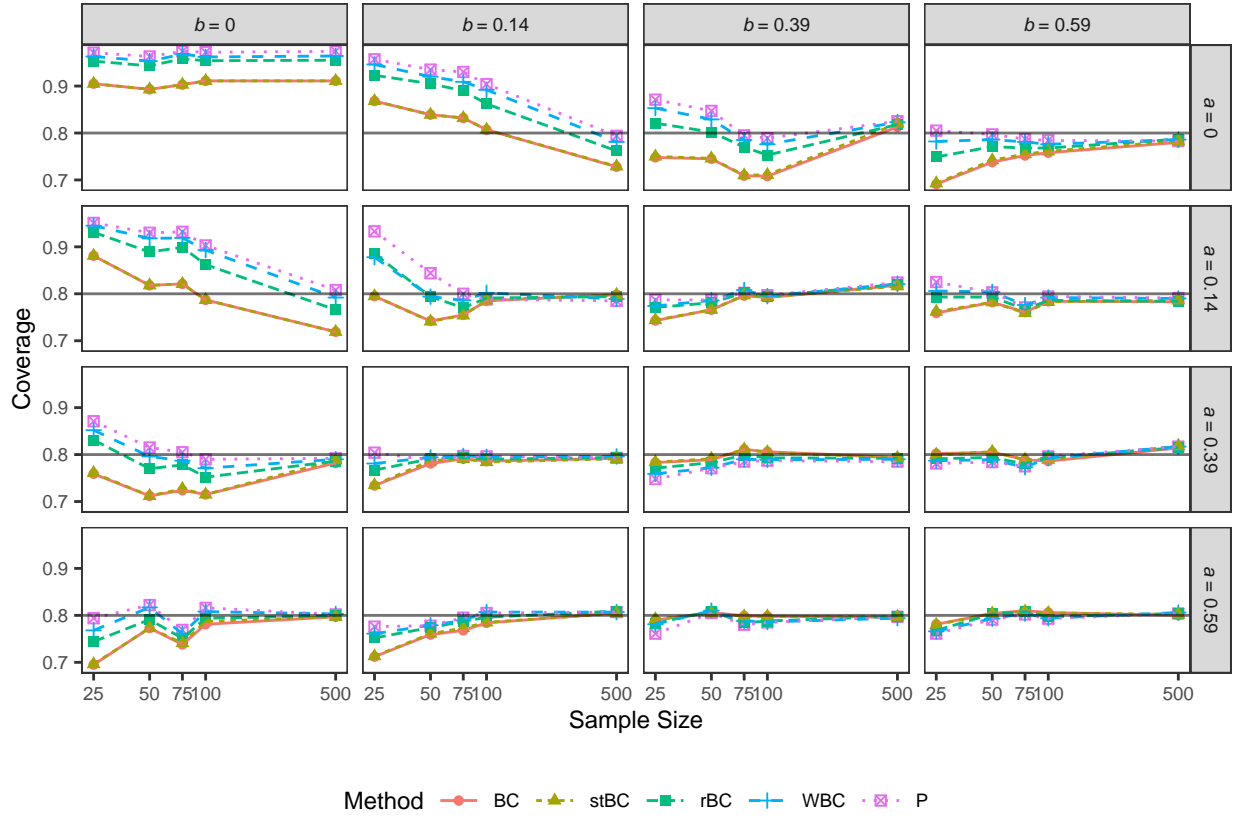

**SM Figure 30.** Coverage of all methods set at 80% confidence level across the range of  $a$ -path sizes,  $b$ -path sizes, and sample sizes. *Note.* ‘BC’ = bias-corrected bootstrap confidence interval, ‘stBC’ = significance-tested bias-corrected bootstrap confidence interval, ‘rBC’ = reduced bias-corrected bootstrap confidence interval, ‘WBC’ = 30% Winsorized bias-corrected bootstrap confidence interval, ‘P’ = percentile bootstrap confidence interval. The black horizontal line at .80 on the graphs represents target coverage. The  $x$ -axis is on the natural log scale.

# Width Graphs

Confidence Level = 95%

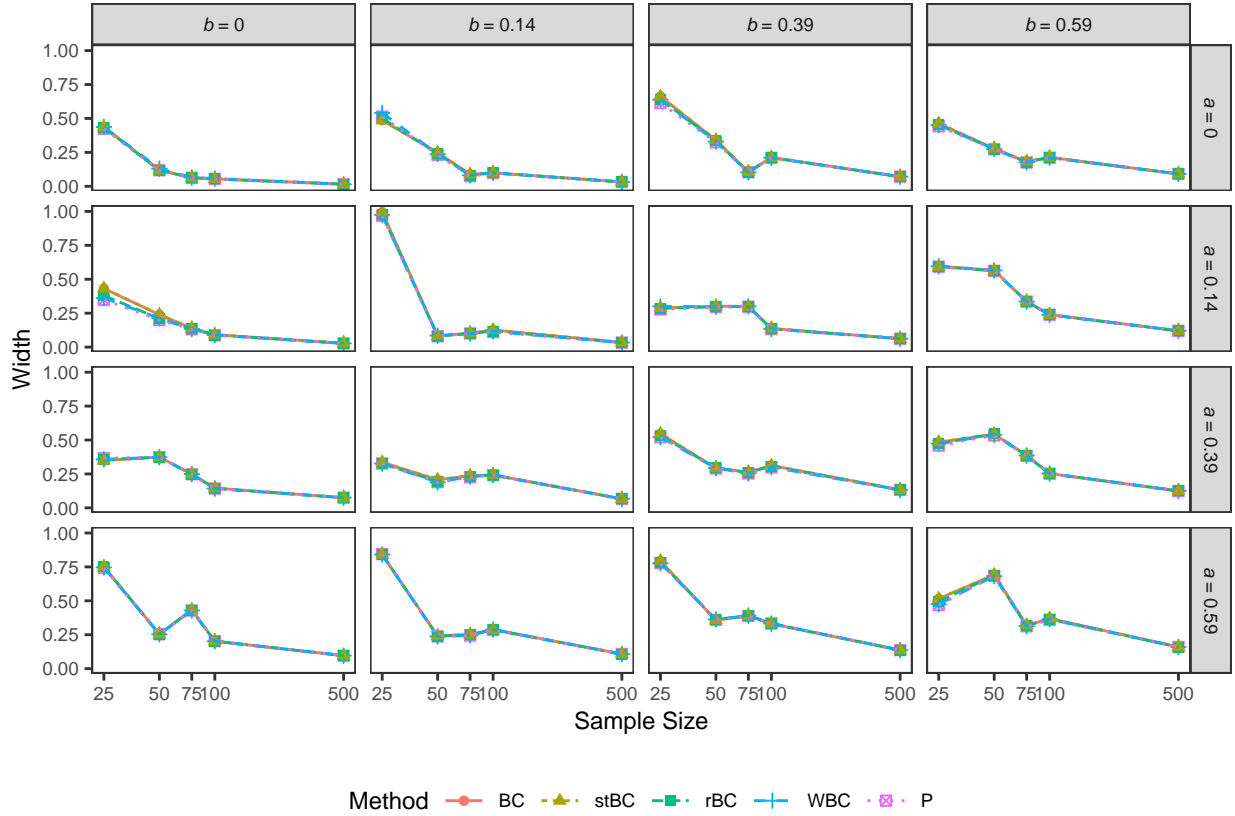

**SM Figure 31.** Width of all methods set at 95% confidence level across the range of  $a$ -path sizes,  $b$ -path sizes, and sample sizes. *Note.* ‘BC’ = bias-corrected bootstrap confidence interval, ‘stBC’ = significance-tested bias-corrected bootstrap confidence interval, ‘rBC’ = reduced bias-corrected bootstrap confidence interval, ‘WBC’ = 30% Winsorized bias-corrected bootstrap confidence interval, ‘P’ = percentile bootstrap confidence interval. The  $x$ -axis is on the natural log scale.



Confidence Level = 90%

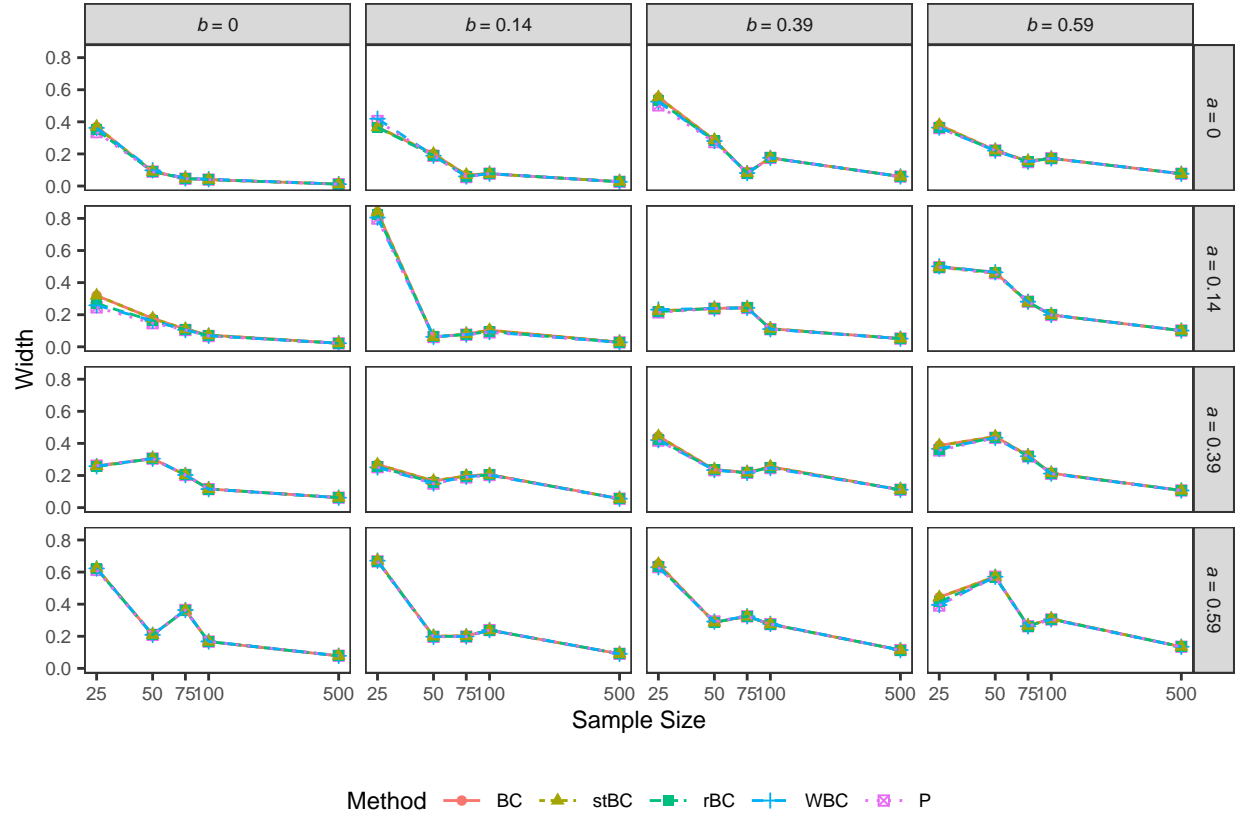

**SM Figure 32.** Width of all methods set at 90% confidence level across the range of  $a$ -path sizes,  $b$ -path sizes, and sample sizes. *Note.* ‘BC’ = bias-corrected bootstrap confidence interval, ‘stBC’ = significance-tested bias-corrected bootstrap confidence interval, ‘rBC’ = reduced bias-corrected bootstrap confidence interval, ‘WBC’ = 30% Winsorized bias-corrected bootstrap confidence interval, ‘P’ = percentile bootstrap confidence interval. The  $x$ -axis is on the natural log scale.

Confidence Level = 80%

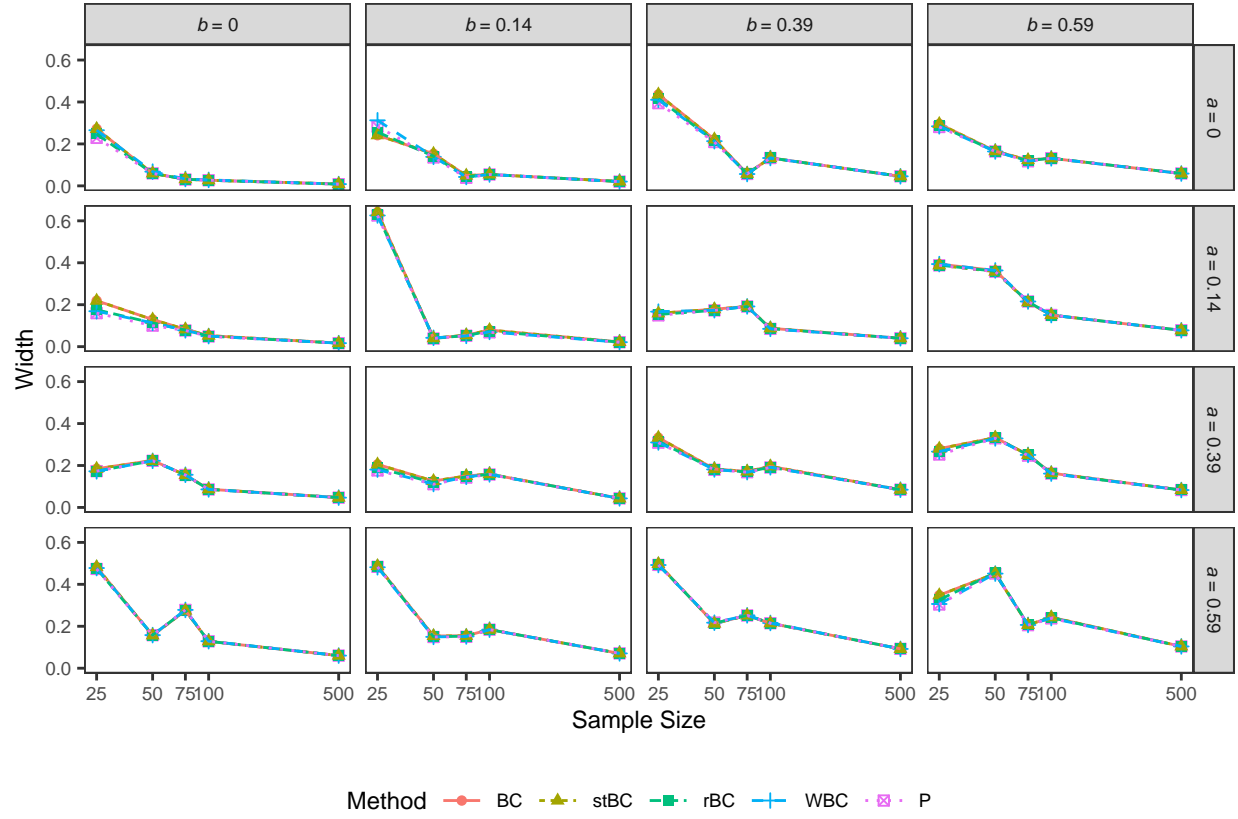

**SM Figure 33.** Width of all methods set at 80% confidence level across the range of  $a$ -path sizes,  $b$ -path sizes, and sample sizes. *Note.* ‘BC’ = bias-corrected bootstrap confidence interval, ‘stBC’ = significance-tested bias-corrected bootstrap confidence interval, ‘rBC’ = reduced bias-corrected bootstrap confidence interval, ‘WBC’ = 30% Winsorized bias-corrected bootstrap confidence interval, ‘P’ = percentile bootstrap confidence interval. The  $x$ -axis is on the natural log scale.

## Rejection Rate Tables

Confidence Level = 95%

| Factor                                                       | LR $\chi^2$ | df  | <i>p</i> -value |
|--------------------------------------------------------------|-------------|-----|-----------------|
| <i>a</i>                                                     | 127825      | 3   | < .001          |
| <i>b</i>                                                     | 129185      | 3   | < .001          |
| Method                                                       | 800         | 4   | < .001          |
| <i>n</i>                                                     | 64392       | 4   | < .001          |
| <i>a</i> $\times$ <i>b</i>                                   | 4844        | 9   | < .001          |
| <i>a</i> $\times$ Method                                     | 68          | 12  | < .001          |
| <i>a</i> $\times$ <i>n</i>                                   | 8021        | 12  | < .001          |
| <i>b</i> $\times$ Method                                     | 56          | 12  | < .001          |
| <i>b</i> $\times$ <i>n</i>                                   | 7884        | 12  | < .001          |
| Method $\times$ <i>n</i>                                     | 97          | 16  | < .001          |
| <i>a</i> $\times$ <i>b</i> $\times$ Method                   | 48          | 36  | .089            |
| <i>a</i> $\times$ <i>b</i> $\times$ <i>n</i>                 | 2460        | 36  | < .001          |
| <i>a</i> $\times$ Method $\times$ <i>n</i>                   | 8           | 48  | 1.00            |
| <i>b</i> $\times$ Method $\times$ <i>n</i>                   | 9           | 48  | 1.00            |
| <i>a</i> $\times$ <i>b</i> $\times$ Method $\times$ <i>n</i> | 25          | 144 | 1.00            |

**SM Table 1.** ANOVA table for the results of the logistic regression model predicting rejection of null hypothesis (0 = No, 1 = Yes) with *a*- and *b*-path sizes, method used, sample size, and all possible interactions between these four factors. Type II sums of squares were used. *Note.* ‘*a*’ = *a*-path size, ‘*b*’ = *b*-path size, ‘Method’ = bootstrap confidence interval method, ‘*n*’ = sample size, ‘LR  $\chi^2$ ’ =  $\chi^2$  statistic for likelihood ratio test, ‘df’ = degrees of freedom.

|             | Estimate | Std. Error | $z$ -value | $p$ -value |
|-------------|----------|------------|------------|------------|
| (Intercept) | -8.267   | 0.035      | -236.042   | < .001     |
| $a = 0.14$  | 2.804    | 0.021      | 130.808    | < .001     |
| $a = 0.39$  | 4.775    | 0.023      | 211.041    | < .001     |
| $a = 0.59$  | 5.254    | 0.023      | 226.621    | < .001     |
| $b = 0.14$  | 2.870    | 0.022      | 131.636    | < .001     |
| $b = 0.39$  | 4.849    | 0.023      | 210.874    | < .001     |
| $b = 0.59$  | 5.313    | 0.024      | 225.804    | < .001     |
| BCBCI       | 0.322    | 0.016      | 20.105     | < .001     |
| rBCBCI      | 0.153    | 0.016      | 9.521      | < .001     |
| stBCBCI     | 0.315    | 0.016      | 19.687     | < .001     |
| WBCBCI      | 0.060    | 0.016      | 3.716      | < .001     |
| $n = 25$    | -2.207   | 0.017      | -126.485   | < .001     |
| $n = 50$    | -0.933   | 0.016      | -58.760    | < .001     |
| $n = 500$   | 1.859    | 0.017      | 110.487    | < .001     |
| $n = 75$    | -0.336   | 0.016      | -21.611    | < .001     |

**SM Table 2.** Table of regression coefficient estimates and their standard errors,  $z$ -values, and  $p$ -values from the logistic regression model predicting rejection of null hypothesis (0 = No, 1 = Yes) with  $a$ - and  $b$ -path sizes, Method used, and sample size (no interactions). *Note.* ‘ $a$ ’ =  $a$ -path size, ‘ $b$ ’ =  $b$ -path size, ‘BCBI’ = bias-corrected bootstrap confidence interval, ‘stBCBI’ = significance-tested bias-corrected bootstrap confidence interval, ‘rBCBI’ = reduced bias-corrected bootstrap confidence interval, ‘WBCBI’ = 30% Winsorized bias-corrected bootstrap confidence interval, ‘ $n$ ’ = sample size. The reference group (intercept) corresponds to the percentile bootstrap confidence interval (PBCI) with  $a = b = 0$  and  $n = 100$ .
